# Supplementary material for: Practical and stereoselective synthesis of β-amino sulfones from alkyl phenyl sulfones and N-(tert-butylsulfinyl) aldimines
Source: Royal Society of Chemistry journal article supplement (doi:10.1039/c1ob05992k), 2011-01-01
Supplement: c1ob05992k.pdf [file c1ob05992k.pdf]

## Supporting Information

---

# Practical and Stereoselective Synthesis of $\beta$ -Amino Sulfones from Alkyl Phenyl Sulfones and N-(tert-Butylsulfinyl) Aldimines

Hua Zhang,<sup>a,b</sup> Ya Li,<sup>b</sup> Wei Xu,<sup>c</sup> Wenrui Zheng,<sup>b</sup> Pei Zhou<sup>\*d</sup> and Zhihua Sun<sup>\*b</sup>

### Table of contents

|                                                                                                                                 |        |
|---------------------------------------------------------------------------------------------------------------------------------|--------|
| General .....                                                                                                                   | S2     |
| Preparation and physical data of compounds <b>3</b> and <b>5</b> .....                                                          | S3-7   |
| Determination of the configuration of <b>5c</b> by X-ray analysis.....                                                          | S8     |
| Example of determination of dr ratio for <b>3a/3a'</b> (entry 1, Table 1) by <sup>1</sup> H NMR and HPLC-MS.....                | S9-10  |
| <sup>1</sup> H NMR and HPLC-MS spectra on the crude products for determination of dr ratio of <b>3/3'</b> and <b>5/5'</b> ..... | S11-20 |
| Determination of the facial selectivity and isomer ratio for entry 3 and entry 4 (Table 2).....                                 | S21-24 |
| Computational studies for the transition state of the reaction between compound <b>2a</b> and <b>4b</b> .....                   | S25-26 |
| NMR spectra for all products.....                                                                                               | S27-41 |

[\*] Prof. Pei Zhou, Prof. Zhihua Sun

<sup>a</sup> School of Environment Science and Engineering, Shanghai Jiaotong University, Shanghai 200240, China.

<sup>b</sup> College of Chemistry and Chemical Engineering, Shanghai University of Engineering Science, Shanghai 201600, China, Fax: 21 6779 1432; Tel: 21 6779 1432;  
E-mail: [sungaris@gmail.com](mailto:sungaris@gmail.com)

<sup>c</sup> Department of Biology, Texas A&M University, College Station, Texas 77843, USA.

<sup>d</sup> Key Laboratory of Urban Agriculture (South), School of Agriculture College and Biology, Ministry of Agriculture, Shanghai Jiaotong University Fax: 21 3420 5762; Tel: 3420 5762;  
E-mail: [peizhousjtu@163.com](mailto:peizhousjtu@163.com).

## General:

Unless otherwise mentioned, solvents and reagent were purchased from commercial sources and used as received. THF was freshly distilled over sodium. N-(tert-Butanesulfinyl)imines and alkylphenyl sulfones were prepared using known procedures.  $^1\text{H}$  NMR spectra were recorded on 400 MHz spectrometers with  $\text{Me}_4\text{Si}$  as internal standard.  $^{13}\text{C}$  NMR spectra were recorded on 100 MHz spectrometers. Mass spectra were taken on a HP5989A spectrometer. High-resolution mass data were recorded on a high-resolution mass spectrometer in the ESI or MALDI mode.

## Preparation and physical data of compounds **3** and **5**

Typical procedure for the synthesis of compound **3a**.

LiHMDS (1.3 equiv, 1.3 mL, 1.0 mol/L) was added to a mixture of the imine **2a** (1 mmol) and methylphenyl sulfone **1** (1.3 equiv, 1.3 mmol) in THF (5 mL) at  $-70\text{ }^{\circ}\text{C}$ . Reaction mixtures were stirred over 1 h. Then half-saturated  $\text{NH}_4\text{Cl-H}_2\text{O}$  solution (2 mL) was added at lower temperature and the quenched reaction mixture was extracted three times with ethyl acetate. The combined organic layers were dried over anhydrous  $\text{MgSO}_4$ . Evaporation of the solvent afforded the crude product, which was subject to flash chromatography to give the corresponding sulfonamide **3a** (340 mg, 93 %).

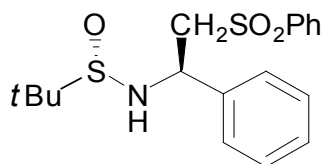

**3a**

White solid, mp  $144.2\text{-}145.4\text{ }^{\circ}\text{C}$ ;  $[\alpha]_{\text{D}}^{25} -0.16$  ( $c = 0.77$ ,  $\text{CHCl}_3$ );  $^1\text{H NMR}$  (400 MHz,  $\text{CDCl}_3$ ):  $\delta/\text{ppm}$ : 7.83-7.94 (m, 2H), 7.61-7.65 (m, 1H), 7.50-7.54 (m, 2H), 7.28-7.32 (m, 5H), 5.01-5.05 (m, 1H), 4.63 (d,  $J = 3.2$  Hz, 1H), 3.93 (d, d  $J^1 = 14.4$  Hz,  $J^2 = 8.4$  Hz, 1H), 3.52 (d, d  $J^1 = 14.4$  Hz,  $J^2 = 4.4$  Hz, 1H), 1.24 (s, 9H);  $^{13}\text{C NMR}$  (100 MHz,  $\text{CDCl}_3$ )  $\delta/\text{ppm}$ : 139.5, 138.3, 133.8, 129.3, 128.9, 128.6, 127.8, 127.6, 61.7, 56.4, 54.9, 22.4; MALDI calcd. For  $\text{C}_{18}\text{H}_{24}\text{NO}_3\text{S}_2$   $[\text{M}+\text{H}]^+$ : 366.1192, Found 366.1188

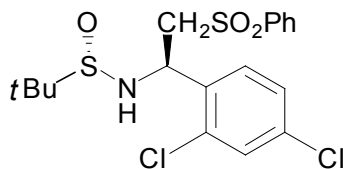

**3b**

White solid, mp  $112.9\text{-}115.4\text{ }^{\circ}\text{C}$ ;  $[\alpha]_{\text{D}}^{25} 9.29$  ( $c = 0.76$ ,  $\text{CHCl}_3$ );  $^1\text{H NMR}$  ( $\text{CDCl}_3$ )  $\delta/\text{ppm}$ : 7.80-7.90 (m, 2H), 7.66-7.63 (m, 1H), 7.54-7.48 (m, 3H), 7.28-7.25 (m, 2H), 5.31-5.28 (m, 1H), 5.05 (d,  $J = 6$  Hz, 1H), 3.91 (dd,  $J^1 = 14.0$  Hz,  $J^2 = 8.0$  Hz, 1H), 3.56 (dd,  $J^1 = 14.4$  Hz,  $J^2 = 4.0$  Hz, 1H), 1.25 (s, 9H);  $^{13}\text{C NMR}$  ( $\text{CDCl}_3$ )  $\delta/\text{ppm}$ : 139.2, 135.1,

134.9, 134.5, 133.9, 133.3, 130.6, 129.7, 129.3, 127.7, 60.0, 56.8, 52.5, 22.4; MALDI calcd.For C<sub>18</sub>H<sub>22</sub>NO<sub>3</sub>S<sub>2</sub>Cl<sub>2</sub> [M + 1]<sup>+</sup>: 434.0413, Found 434.0401

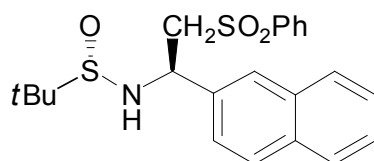

**3c**

White solid, mp 143.2-144.1°C; [ $\alpha$ ]<sub>D</sub><sup>25</sup> 21.59 (c = 0.73, CHCl<sub>3</sub>); <sup>1</sup>H NMR (CDCl<sub>3</sub>)  $\delta$ /ppm: 7.89-7.42 (m, 12H), 5.88 (d, J = 6.8, 1H), 5.17 (s, 1H), 4.27 (dd, J<sup>1</sup> = 13.6 Hz, J<sup>2</sup> = 9.6Hz, 1H), 3.70 (d, J = 13.6 Hz, 1H), 1.19 (s, 9H); <sup>13</sup>C NMR (CDCl<sub>3</sub>)  $\delta$ /ppm: 139.3, 133.9, 133.9, 133.0, 129.5, 129.0, 127.8, 126.7, 125.9, 125.6, 122.9, 61.0, 56.0, 50.7, 22.5; MALDI calcd.For C<sub>22</sub>H<sub>26</sub>NO<sub>3</sub>S<sub>2</sub> [M<sup>+</sup> + H]<sup>+</sup>: 416.1349, Found 416.1340

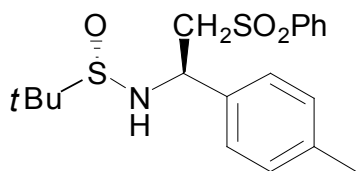

**3d**

White solid, mp: 76.4-78.4°C; [ $\alpha$ ]<sub>D</sub><sup>25</sup> 28.89 (c = 0.72, CHCl<sub>3</sub>); <sup>1</sup>H NMR (CDCl<sub>3</sub>)  $\delta$ /ppm: 7.79 (d, 2H), 7.85-7.82 (m, 2H), 7.63-7.61 (m, 1H), 7.54-7.49 (m, 2H), 7.21-7.12 (m, 2H), 7.12-7.10 (m, 2H), 4.99-4.97 (m, 1H), 4.60 (d, J = 3.2, 1H), 3.91 (dd, J<sup>1</sup> = 14.4Hz, J<sup>2</sup> = 8.4Hz, 1H), 3.50 (dd, J<sup>1</sup> = 14.0Hz, J<sup>2</sup> = 9.6 Hz, 1H), 1.23 (s, 9H); <sup>13</sup>C NMR (CDCl<sub>3</sub>)  $\delta$ : 139.6, 138.5, 135.2, 133.7, 139.5, 129.5, 129.3, 127.8, 127.5, 61.7, 56.3, 54.6, 22.5, 21.0; MALDI calcd.For C<sub>19</sub>H<sub>26</sub>NO<sub>3</sub>S<sub>2</sub> [M + H]<sup>+</sup>: 380.1349, Found 380.1348

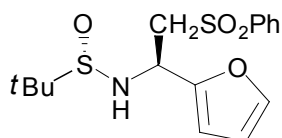

**3e**

Yellow oil, [ $\alpha$ ]<sub>D</sub><sup>25</sup> 37.51 (c = 0.61, CHCl<sub>3</sub>); <sup>1</sup>H NMR (CDCl<sub>3</sub>)  $\delta$ /ppm: 7.84-7.83 (m, 2H), 7.65-7.61 (m, 1H), 7.55-7.51 (m, 2H), 7.22 (t, 1H), 6.38 (d, J = 3.2 Hz, 1H), 6.27 (m, 1H), 5.06 (m, 1H), 3.91 (dd, J<sup>1</sup> = 14.4 Hz, J<sup>2</sup> = 7.6 Hz, 1H), 3.66 (dd, J<sup>1</sup> = 14.4 Hz,

$J^2 = 5.2$  Hz, 1H); 1.23 (s, 9H);  $^{13}\text{C}$  NMR ( $\text{CDCl}_3$ )  $\delta/\text{ppm}$ : 150.7, 142.8, 139.5, 133.7, 127.8, 110.6, 109.2, 59.6, 56.5, 49.6, 22.4; MALDI calcd. For  $\text{C}_{16}\text{H}_{22}\text{NO}_4\text{S}_2$   $[\text{M} + \text{H}]^+$ : 356.0985, Found 356.0991

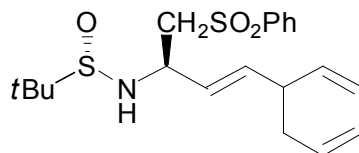

**3f**

White solid, mp 99.1-103.3°C;  $[\alpha]_{\text{D}}^{25}$  57.82 ( $c = 0.66$ ,  $\text{CHCl}_3$ );  $^1\text{H}$  NMR ( $\text{CDCl}_3$ )  $\delta/\text{ppm}$ : 7.93 (m, 2H), 7.67-7.64 (m, 2H), 7.58-7.54 (m, 2H), 7.32-7.31 (m, 5H), 6.65 (dd,  $J^1 = 15.6$  Hz,  $J^2 = 0.8$  Hz, 1H), 6.22 (dd,  $J^1 = 15.6$  Hz,  $J^2 = 7.2$  Hz, 1H), 3.75 (dd,  $J^1 = 14.0$  Hz,  $J^2 = 8$  Hz, 1H), 3.42 ( $J^1 = 14.0$  Hz,  $J^2 = 8$  Hz, 1H), 1.27 (s, 9H);  $^{13}\text{C}$  NMR ( $\text{CDCl}_3$ )  $\delta/\text{ppm}$ : 139.7, 135.6, 133.9, 133.9, 129.4, 128.5, 128.3, 127.9, 126.8, 126.5, 61.1, 56.4, 53.6, 22.5; MALDI calcd. For  $\text{C}_{20}\text{H}_{25}\text{NO}_3\text{S}_2$   $[\text{M} + \text{Na}]^+$ : 414.1168, Found 414.1171

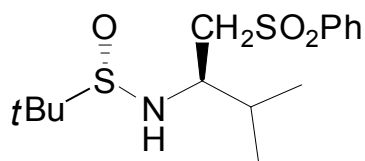

**3g**

White solid, mp 114.2-115.4°C;  $[\alpha]_{\text{D}}^{25}$  21.65 ( $c = 0.52$ ,  $\text{CHCl}_3$ );  $^1\text{H}$  NMR ( $\text{CDCl}_3$ )  $\delta/\text{ppm}$  7.96-7.94 (m, 2H), 7.69-7.66 (m, 1H), 7.62-7.58 (m, 1H), 4.07 (d,  $J = 5.6$  Hz, 1H), 3.71-3.66 (m, 1H), 3.52-3.46 (m, 1H), 3.22 (dd,  $J^1 = 14.0$  Hz,  $J^2 = 3.2$  Hz, 1H), 2.28 (m, 1H), 1.26 (s, 9H), 0.98 (m, 6H);  $^{13}\text{C}$  NMR ( $\text{CDCl}_3$ )  $\delta/\text{ppm}$ : 104.2, 75.8, 57.5, 29.1, 22.9, 22.3, 16.9; MALDI calcd. For  $\text{C}_{15}\text{H}_{26}\text{NO}_3\text{S}_2$   $[\text{M} + \text{H}]^+$ : 332.1349, Found 332.1355

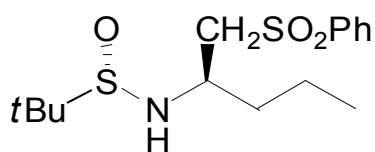

**3h**

White solid, mp 64.3-67.5°C;  $[\alpha]_D^{25}$  33.27 (c = 1.02, CHCl<sub>3</sub>); <sup>1</sup>H NMR (CDCl<sub>3</sub>) δ/ppm: 7.97 (m, 2H), 7.70-7.62 (m, 1H), 7.60-7.58 (m, 1H), 4.31 (d, J = 4.8 Hz, 1H), 3.92 (m, 1H), 3.72 (dd, J<sup>1</sup> = 14.0 Hz, J<sup>2</sup> = 8.0 Hz, 1H), 3.17 (dd, J<sup>1</sup> = 14.0 Hz, J<sup>2</sup> = 3.2 Hz, 1H), 1.93-1.92 (m, 1H), 1.76-1.72 (m, 1H), 1.45-1.39 (m, 2H), 1.25 (s, 9H), 0.938 (t, J = 7.2Hz, 3H); <sup>13</sup>C NMR (CDCl<sub>3</sub>) δ/ppm: 139.9, 133.8, 129.4, 127.8, 61.4, 56.0, 36.3, 22.5, 19.0, 13.4; MALDI calcd.For C<sub>15</sub>H<sub>26</sub>NO<sub>3</sub>S<sub>2</sub> [M+ H]<sup>+</sup>:332.1349, Found 332.1348

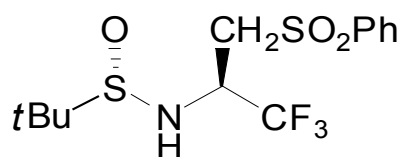

**3i**

White solid, mp 124.6-125.1°C;  $[\alpha]_D^{25}$  16.32 (c = 1.02, CHCl<sub>3</sub>); <sup>1</sup>H NMR (CDCl<sub>3</sub>) δ/ppm: 7.97 (m, 2H), 7.74-7.71 (m, 1H), 7.65-7.62 (m, 2H), 4.48 (m, 1H), 4.04 (d, J = 9.2 Hz, 1H), 3.61 (dd, J<sup>1</sup> = 14.4 Hz, J<sup>2</sup> = 9.6Hz, 1H), 3.45 (dd, J<sup>1</sup> = 14.4 Hz, J<sup>2</sup> = 2.8 Hz, 1H), 1.30 (s, 9H), 0.938 (t, J = 7.2Hz, 3H); <sup>13</sup>C NMR (CDCl<sub>3</sub>) δ/ppm: 139.3, 134.4, 129.6, 127.9, 57.6, 55.4, 54.2, 53.9, 22.3; <sup>19</sup>F NMR (DMSO) δ/ppm: 73.7-73.8 (d, 3F), MALDI calcd.For C<sub>13</sub>H<sub>19</sub>NO<sub>3</sub>S<sub>2</sub>F<sub>3</sub> [M + H]<sup>+</sup>:358.0753, Found 358.0744

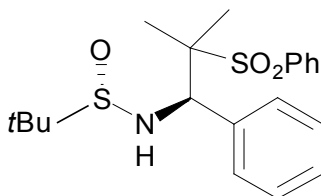

**5a**

White solid, mp 127.1-129.1 °C;  $[\alpha]_D^{25}$  -47.99 (c = 0.70, CHCl<sub>3</sub>); <sup>1</sup>H NMR (CDCl<sub>3</sub>) δ/ppm: 7.71 (d, 2H), 7.70-7.59 (t, 1H), 7.50-7.48 (t, 2H), 7.42-7.40 (m, 2H), 7.38-7.35 (m, 3H), 5.80 (d, J = 2Hz, 1H), 4.98 (d, J = 2.4Hz, 1H), 1.43 (s, 3H), 1.33 (s,9H), 0.88 (s, 3H); <sup>13</sup>C NMR (CDCl<sub>3</sub>) δ/ppm: 130.5, 129.8, 128.9, 128.4, 127.9, 127.2, 66.1, 63.2, 60.9, 57.4, 55.6, 55.5, 42.3, 22.6, 16.5, 14.0; MALDI calcd.For C<sub>20</sub>H<sub>28</sub>NO<sub>3</sub>S<sub>2</sub> [M + H]<sup>+</sup>:394.1505, Found 394.1503

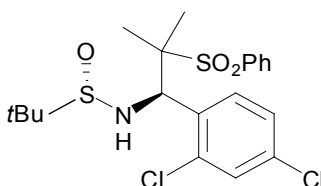

### 5b

White solid, mp 68.7-70.1°C;  $[\alpha]_{\text{D}}^{25}$  -46.49 ( $c = 0.57, \text{CHCl}_3$ );  $^1\text{H NMR}$  ( $\text{CDCl}_3$ )  $\delta/\text{ppm}$ : 7.92 (d,  $J = 7.6$  Hz, 2H), 7.78 (d,  $J = 8.8$  Hz, 1H), 7.72 (t,  $J = 7.2$ , 1H), 7.62 (t,  $J = 8.2$  Hz, 2H), 7.42-7.36 (m, 2H), 5.80 (d,  $J = 2.4$ , 1H), 5.62 (d,  $J = 2.8$ , 1H), 1.45 (s, 3H), 1.34 (s, 9H), 0.99 (s, 3H);  $^{13}\text{C NMR}$  ( $\text{CDCl}_3$ )  $\delta/\text{ppm}$ : 130.5, 129.8, 128.9, 128.4, 127.9, 127.2, 66.1, 63.2, 60.9, 57.4, 55.6, 55.5, 42.3, 22.6, 16.5, 14.0; ESI-HRMS calcd. For  $\text{C}_{20}\text{H}_{25}\text{Cl}_2\text{NO}_3\text{S}_2$   $[\text{M} + \text{Na}]^+$ : 484.0551, Found 484.0554

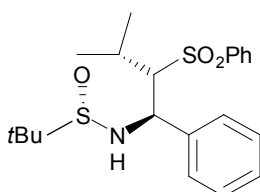

### 5c

White solid, mp 121.0-122.5°C;  $[\alpha]_{\text{D}}^{25}$  3.92 ( $c = 0.20, \text{CHCl}_3$ );  $^1\text{H NMR}$  ( $\text{CDCl}_3$ )  $\delta/\text{ppm}$ : 7.73 (d,  $J = 7.2$  Hz, 2H), 7.72-7.58 (m, 1H), 7.49 (t,  $J = 8.0$  Hz, 2H), 7.36-7.21 (m, 5H), 5.11 (d,  $J = 8.0$  Hz, 1H), 4.38 (d,  $J = 8.0$  Hz, 1H), 3.49 (dd,  $J^1 = 4.4$  Hz,  $J^2 = 3.2$  Hz, 1H), 2.52 (m, 1H), 1.21 (d,  $J = 2.0$  Hz, 3H), 1.19 (d,  $J = 1.6$  Hz, 3H);  $^{13}\text{C NMR}$  ( $\text{CDCl}_3$ )  $\delta/\text{ppm}$ : 140.7, 139.3, 133.2, 129.1, 128.6, 128.6, 128.0, 127.9, 127.8, 127.4, 127.2, 74.7, 60.9, 59.3, 56.9, 26.9, 22.6, 22.3, 20.2; MALDI calcd. For  $\text{C}_{21}\text{H}_{30}\text{NO}_3\text{S}_2$   $[\text{M} + \text{H}]^+$ : 408.1662, Found 408.1650

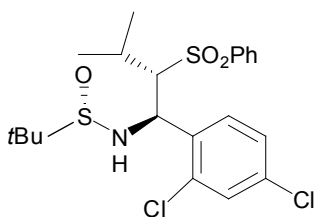

### 5d

White solid, mp 151.3-153.7°C;  $[\alpha]_{\text{D}}^{25}$  5.94 ( $c = 0.63, \text{CHCl}_3$ );  $^1\text{H NMR}$  ( $\text{DMSO}$ )  $\delta/\text{ppm}$ : 7.62-7.61 (m, 1H), 7.58-7.54 (m, 5H), 6.78-6.76 (d,  $J = 8.4$  Hz, 1H), 5.33 (d,  $J = 11.2$  Hz, 1H), 5.11 (m, 1H), 3.97 (d,  $J = 8.8$  Hz, 1H);  $^{13}\text{C NMR}$  ( $\text{CDCl}_3$ )  $\delta/\text{ppm}$ : 140.3, 134.9, 134.9, 133.1, 132.8, 129.8, 128.9, 127.6, 127.4, 70.0, 57.1, 26.7, 22.5, 21.3, 19.9; ESI-HRMS calcd. For  $\text{C}_{21}\text{H}_{27}\text{NO}_3\text{S}_2\text{Cl}_2$   $[\text{M} + \text{Na}]^+$ : 498.0707, Found 498.0710

## Determination of the configuration of **5c** by X-ray analysis

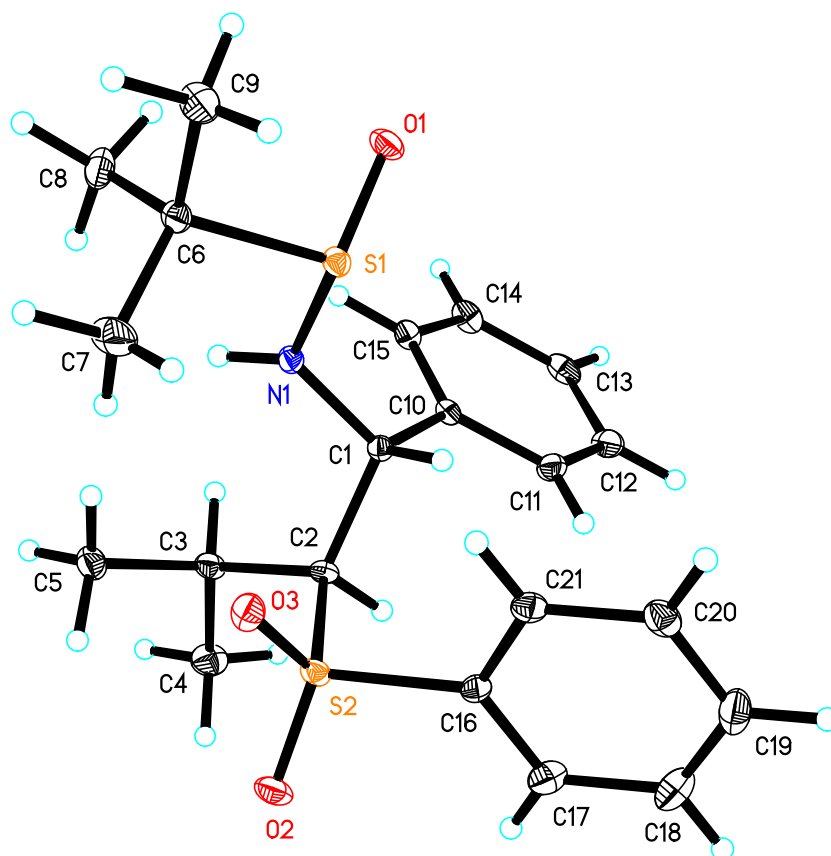



## Example of determination of dr ratio for **3a/3a'** (entry 1, Table 1) by $^1\text{H}$ NMR and HPLC-MS

The dr value has been determined by use of a combination of  $^1\text{H}$  NMR and HPLC-MS spectra analysis on the crude product. High diastereoselectivity was observed in this reaction, which can be roughly determined based on the  $^1\text{H}$  NMR on the crude product. The relatively precise dr value was determined by HPLC-MS (Figure 1), and, based on selected ion chromatogram (Figure 1c), the two diastereomers can be found at  $rt = 10.27$  min and  $11.00$  min respectively.

**3a**,  $rt = 10.27$  min; **3a'**,  $rt = 11.10$  min

**dr = 68.00 : 0.10 = 99 : 1**

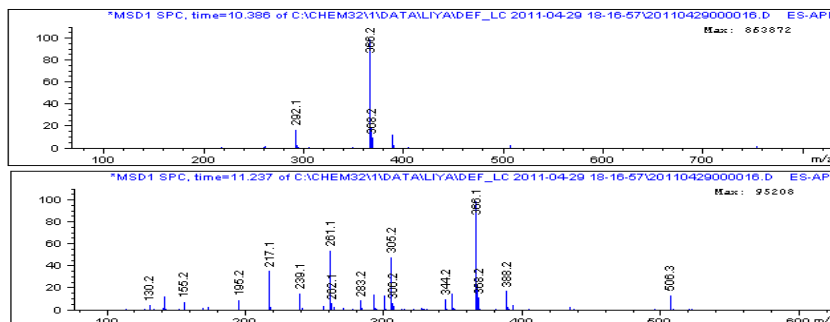

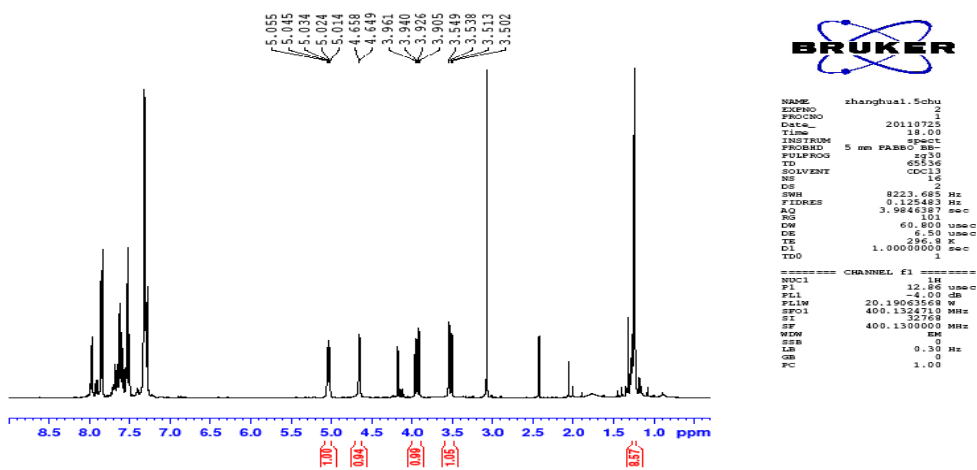

Figure 2.  $^1\text{H}$  NMR on the crude product **3a**

$^1\text{H}$  NMR and HPLC-MS spectra on the crude products for  
 determination of dr ratio of **3/3'** and **5/5'**

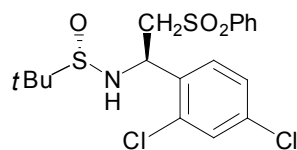

$\text{C}_{18}\text{H}_{21}\text{Cl}_2\text{NO}_3\text{S}_2$   
 Exact Mass: 433.03  
 Mol. Wt.: 434.40

**3b**, rt = 12.41 min; **3b'**, rt = 14.44 min

**dr** = 86.49 : 2.38 = 36 : 1

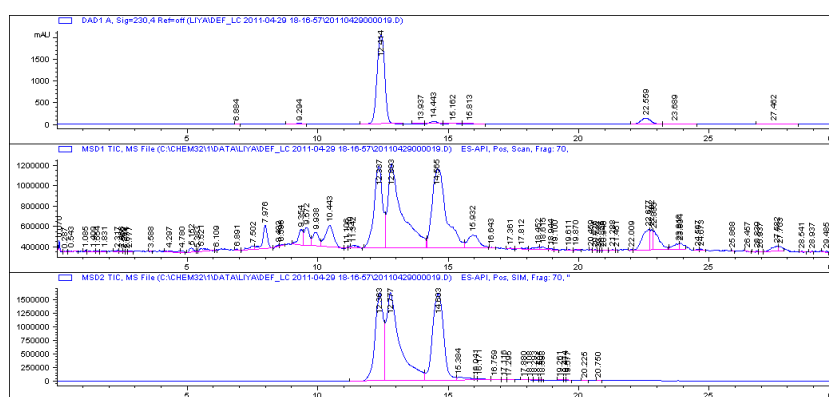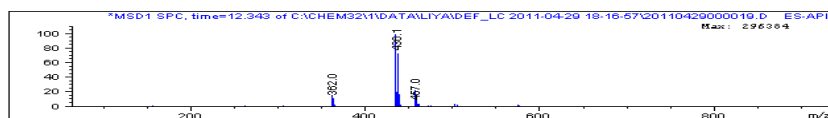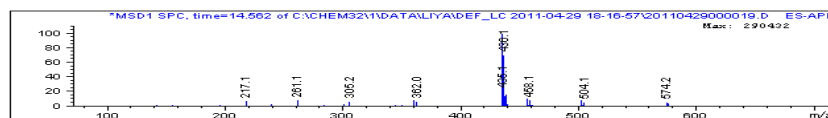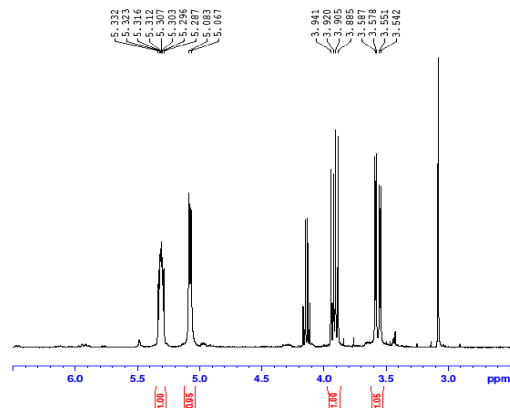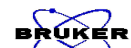

```

NAME shanghai1.4chu
EXPNO 1
PROCNO 1
DATA_ 20110721
TIME 20.15
INSTRUM spect
PROBHD 5 mm PABBO BB-
PULPROG zgpg30
SOLVENT CDCl3
DS 15
DE 8223.695 Hz
FIDRES 0.125443 Hz
AQ 1.984213 sec
RG 28
SW 60.850 usec
DE 4.00 usec
TE 296.2 K
D 1.00000000 sec
TD 1
===== CHANNEL f1 =====
NUC1 13
P1 12.84 usec
PL1 0.00 dB
PL2 20.1902558 dB
SFO1 400.1324710 MHz
SI 32768
WDW EM
SSB 0
RB 0
GB 0
PC 1.00
    
```

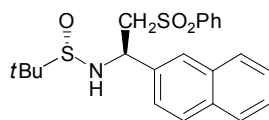

$C_{22}H_{25}NO_3S_2$   
 Exact Mass: 415.13  
 Mol. Wt.: 415.57

**3c**

**3c**,  $rt = 11.94$  min; **3c'**,  $rt = 12.99$  min

**dr = 88.49 : 2.95 = 30 : 1**

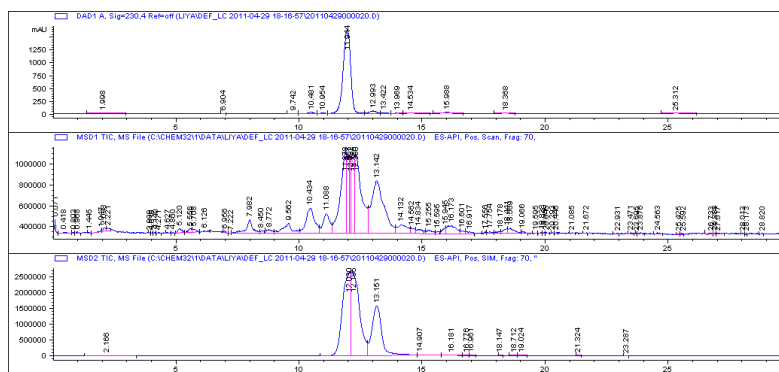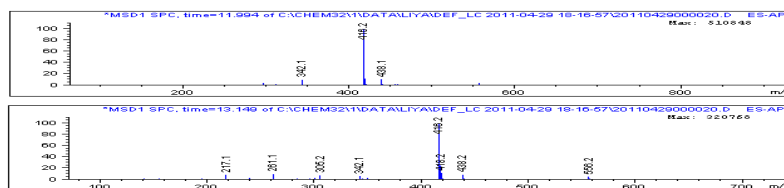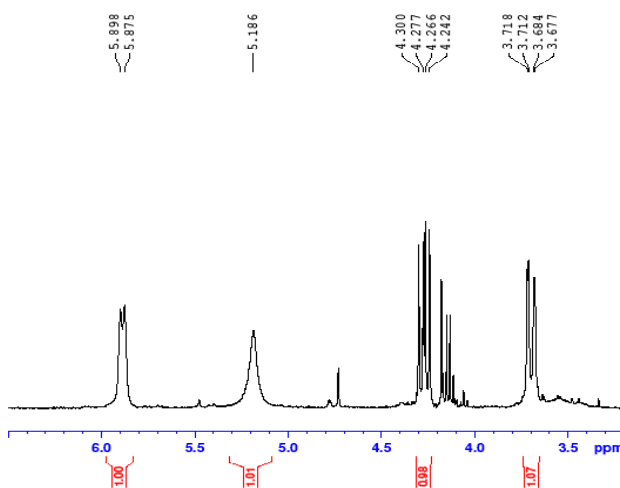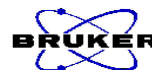

```

NAME zhanghai.1chu
EXPRO 2
PROCNO 1
Date_ 20110725
Time 18.14
INSTRUM spect
PROBHD 5 mm FARR-90
PULPROG zg30
TD 65536
SOLVENT CDCl3
NS 16
DS 2
SWH 8223.685 Hz
FIDRES 0.135483 Hz
AQ 3.9846397 sec
RG 144
DW 60.800 usec
DE 6.50 usec
TE 296.8 K
D1 1.00000000 sec
TDO 1
===== CHANNEL f1 =====
NUC1 1H
P1 12.86 usec
PL1 -4.00 dB
PLW 20.1900388 W
SFO1 400.1324710 MHz
SI 32768
SF 400.1300000 MHz
WDW EM
SSB 0
LB 0.30 Hz
GB 0
PC 1.00
    
```

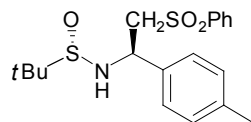

$C_{19}H_{25}NO_3S_2$   
 Exact Mass: 379.13  
 Mol. Wt.: 379.54

**3d**

**3d**, *rt* = 10.99 min; **3d'**, *rt* = 12.20 min

**dr** = 87.20 : 0.30 = **99 : 1**

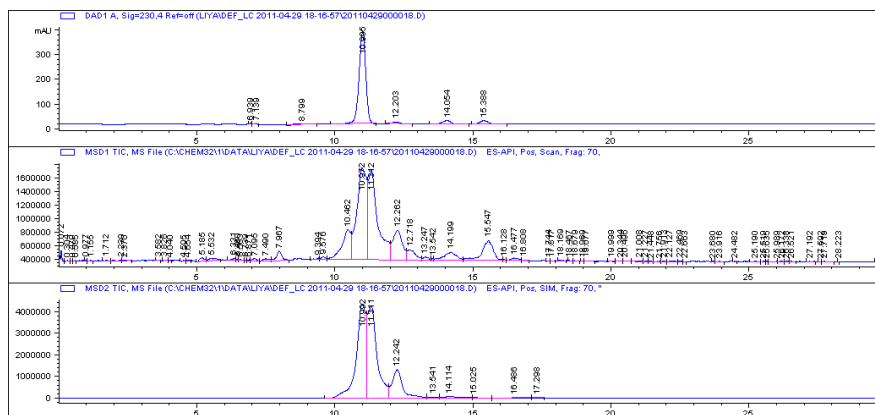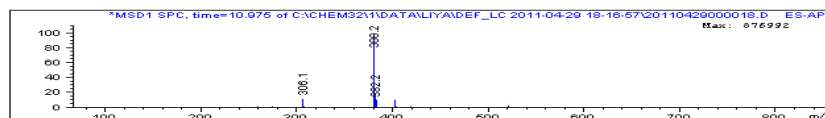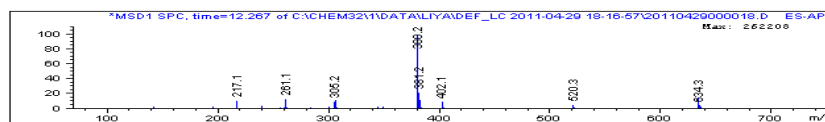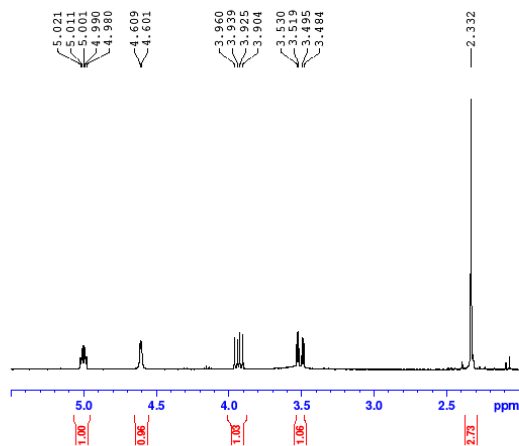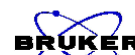

```

NAME      zhanghua1.3chu
EXPNO     2
PROCNO    1
Data_     20110725
Time      21.45
INSTRUM   spect
PROBHD    5 mm F4BBO BB
PULPROG   zg30
TD         65536
SOLVENT    CDCl3
NS         16
DS         2
SWH        8223.685 Hz
FIDRES     0.125463 Hz
AQ         3.9846387 sec
RG         362
DM         60.800 um-c
DE         6.50 um-c
TE         296.2 K
D1         1.00000000 sec
TD0        1

===== CHANNEL f1 =====
NUC1       1H
P1         12.46 um-c
PL1        -4.00 dB
SFO1       20.19003508 MHz
SF         400.1324710 MHz
SI         32768
SF         400.1300000 MHz
MSB        0
MSB        0
LB         0.30 Hz
GB         0
PC         1.00
    
```

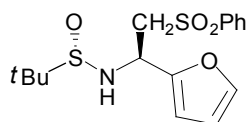

$C_{16}H_{21}NO_4S_2$   
 Exact Mass: 355.09  
 Mol. Wt.: 355.47

**3e**

**3e**,  $rt = 9.76$  min; **3e'**,  $rt = 9.29$  min

**dr = 80.20 : 0.80=99 : 1**

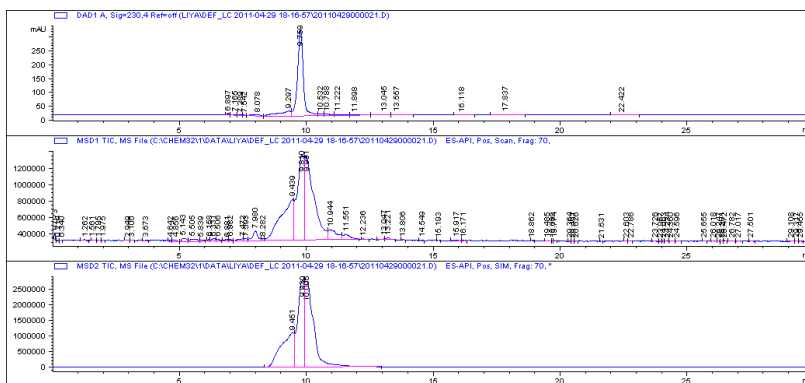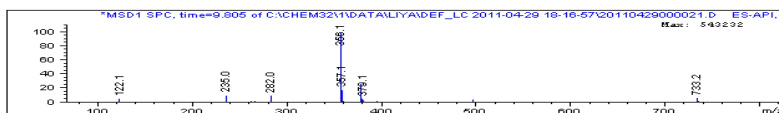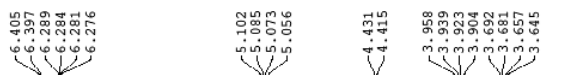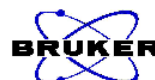

```

NAME      zhanghual_6chu
EXPNO     2
PROCNO    1
Date_     20110725
Time      20.24
INSTRUM   spect
PROBHD    5 mm PABBO BB-
PULPROG   zg30
TD         65536
SOLVENT   CDCl3
NS         16
DS         2
SWH        8223.685 Hz
FIDRES     0.125483 Hz
AQ         3.9846387 sec
RG         128
DW         60.800 usec
DE         6.50 usec
TE         296.7 K
D1         1.00000000 sec
TD0        1
    
```

```

===== CHANNEL f1 =====
NUC1      1H
P1        12.86 usec
FL1       -4.00 dB
PL1W     20.1963568 W
SFO1      400.1324110 MHz
SI        32768
SF        400.1300000 MHz
WDW       EM
SSB       0
LB        0.30 Hz
GB        0
PC        1.00
    
```

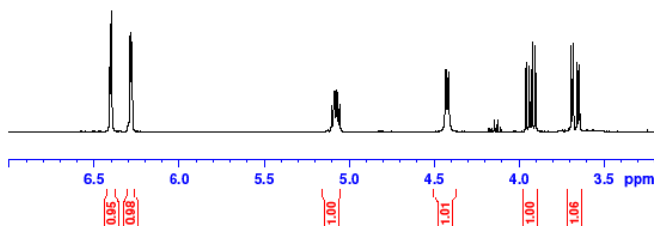

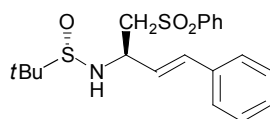

$C_{20}H_{25}NO_3S_2$   
 Exact Mass: 391.13  
 Mol. Wt.: 391.55

**3f**

**3f**, rt = 11.19 min; **3f'**, rt = 12.13 min

**dr = 86.78 : 2.50 = 35 : 1**

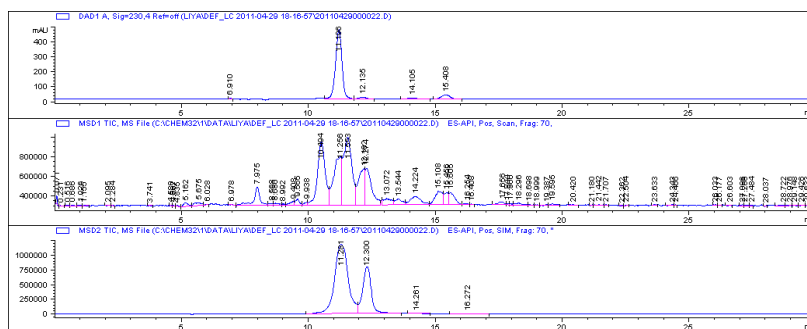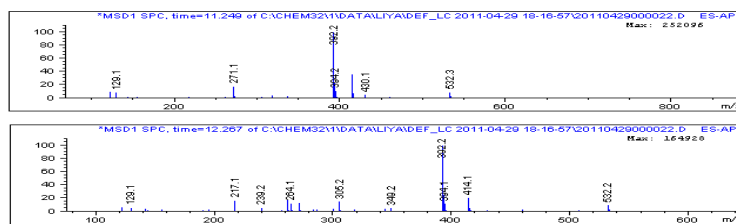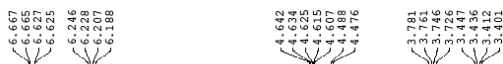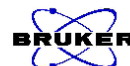

```

NAME      zhanghui.7chu
EXPNO    2
PROCNO   1
DATE_    20110720
TIME     20.37
INSTRUM  spect
PROBHD   5 mm F4BBO BB-
PULPROG  zgpg30
TD        65536
SOLVENT  CDCl3
NS        16
DS        4
SWH       8223.685 Hz
FIDRES   0.322483 Hz
AQ        3.9846387 sec
RG         60.5
DE        69.850 usec
TE        6.50 usec
TE        256.0 K
D1        1.00000000 sec
TD0
===== CHANNEL f1 =====
NUC1      1H
P1        12.86 usec
PL1       -1.00 dB
PL12      20.19023568 W
SFO1      400.1324710 MHz
SI         32768
SF         400.1300000 MHz
WDW        EM
SSB        0
LB         0.30 Hz
GB         0
PC         1.00
    
```

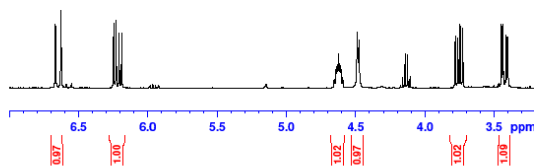

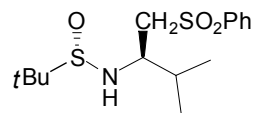

$C_{15}H_{25}NO_3S_2$

Exact Mass: 331.13

Mol. Wt.: 331.49

**3g**

**3g**, rt = 9.99 min; **3g'**, rt = 11.33 min

**dr = 35.45 : 1.22 = 35 : 1**

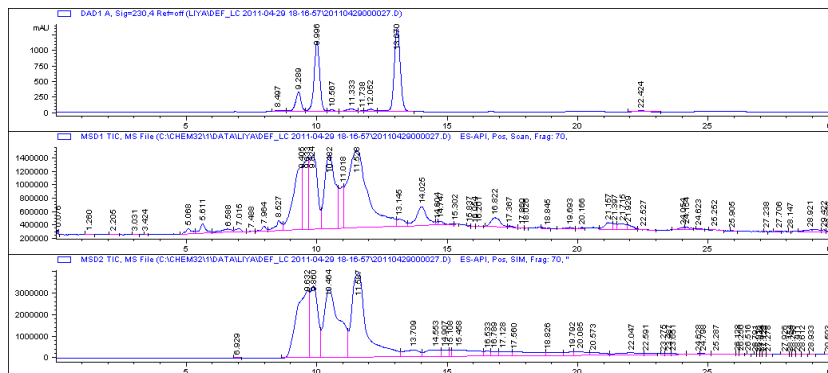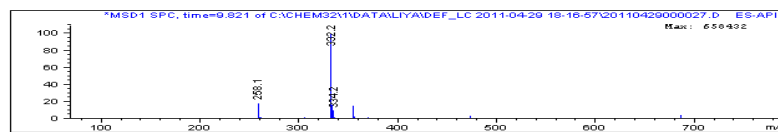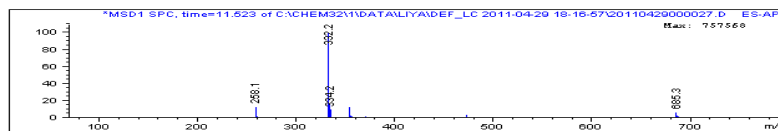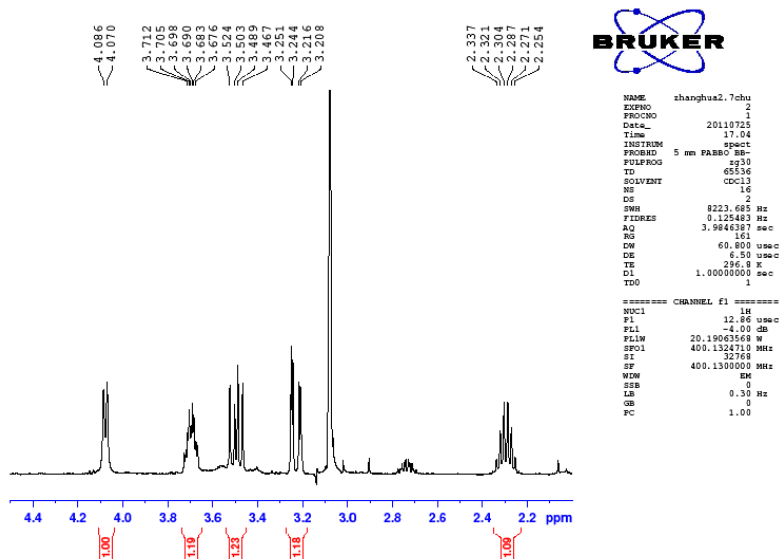



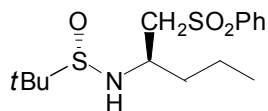

$C_{15}H_{25}NO_3S_2$

Exact Mass: 331.13

Mol. Wt.: 331.49

**3h**

**3h**,  $rt = 10.34$  min; **3h'**,  $rt = 11.19$  min

**dr = 70.45 : 4.01 = 18 : 1**

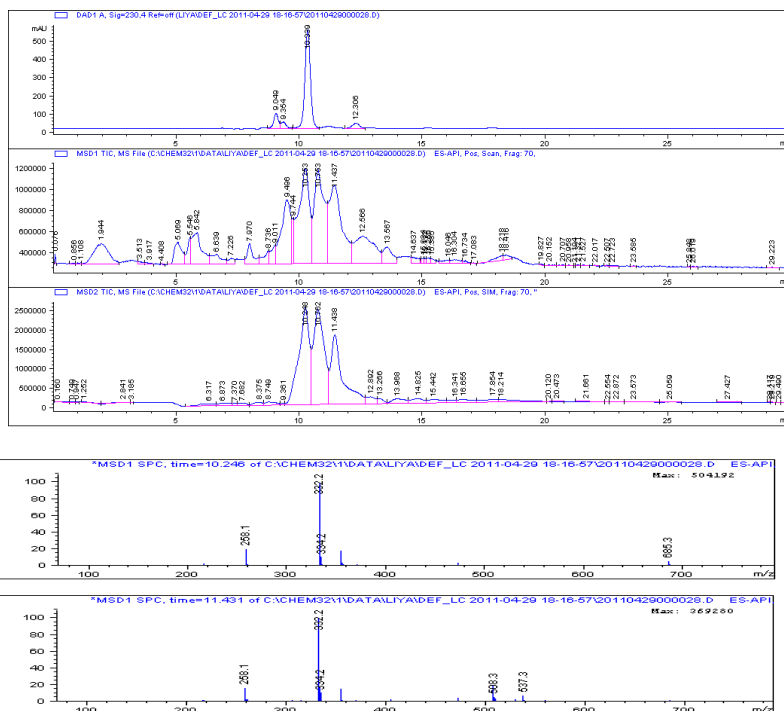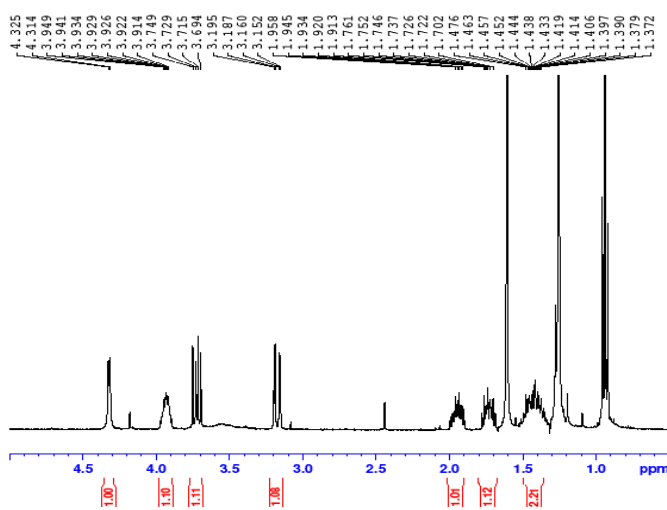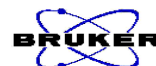

```

NAME      zhanghua2.Scha
EXPNO    2
PROCNO   1
INSTRUM  spect
F2 - 17.33
PROBHD   5 mm F400
PULPROG  zg30
TD       65536
SOLVENT  CDCl3
NS       16
DS       2
SWH      8223.685 Hz
FIDRES   0.125483 Hz
AQ       3.5946397 sec
RG       322
DM       60.800 usec
DE       6.50 usec
TE       296.7 K
D1       1.00000000 sec
TD0      1

===== CHANNEL f1 =====
NUC1     13C
P1       12.86 usec
PL1     -1.90 dB
PL12    20.19063568 W
SFO1     400.1324710 MHz
SI       32768
SF       400.1300000 MHz
WDW      EM
SSB      0
LB       0.30 Hz
GB       0
PC       1.00
    
```

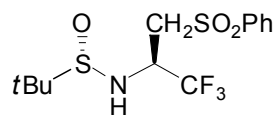

$C_{13}H_{18}F_3NO_3S_2$

Exact Mass: 357.07

Mol. Wt.: 357.41

**3i**

**3i**, rt = 9.56 min; **3i'**, rt = 10.56 min

**dr** = 22.18 : 3.12 = 7 : 1

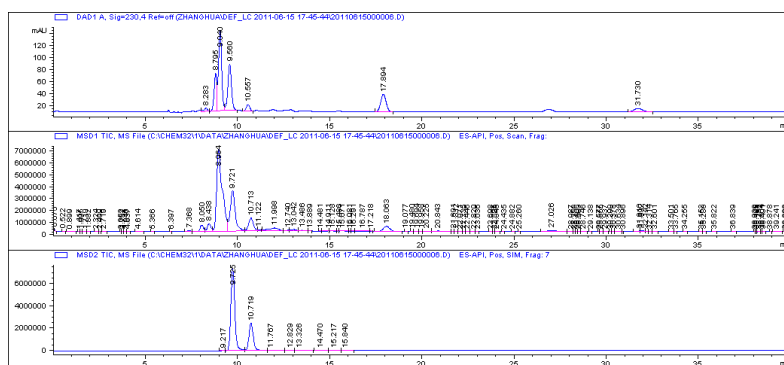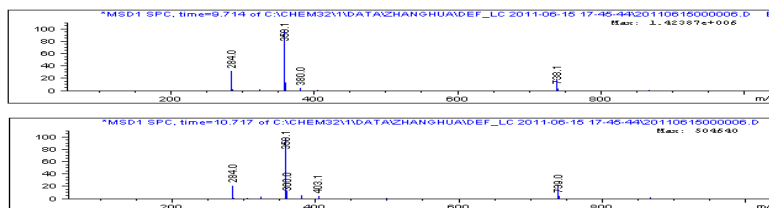

<sup>1</sup>H NMR

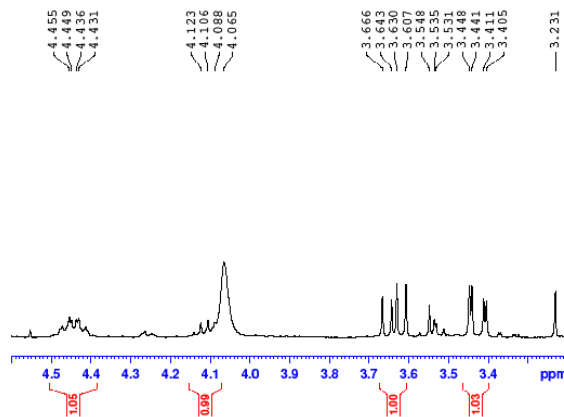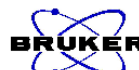

```

NAME zhanghua2.900
EXPNO 31
PROCNO 1
DATE_ 20110531
TIME 17.19
INSTRUM spect
PROBHD 5 mm PABBO BB-
PULPROG zg30
TD 65536
SOLVENT CDCl3
NS 16
DS 2
SWH 8223.685 Hz
FIDRES 0.135483 Hz
AQ 3.9846387 sec
RG 64
DN 60.800 usec
DE 6.50 usec
TE 298.7 K
D1 1.00000000 sec
TD0 1

===== CHANNEL f1 =====
NUC1 1H
P1 11.10 usec
PL1 -4.00 dB
PL12 20.1963568 W
SFO1 400.132410 MHz
SI 32768
SF 400.1300000 MHz
WDM 0
SFB 0
LB 0.30 Hz
GB 0
PC 1.00
    
```

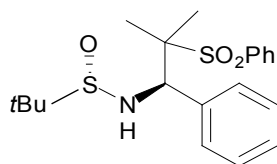

$C_{20}H_{27}NO_3S_2$   
 Exact Mass: 393.14  
 Mol. Wt.: 393.56

**5a**

**5a** rt = 12.90 min; **5a'**, rt = 16.72 min

**dr** = 62.99 : 4.01 = 16 : 1

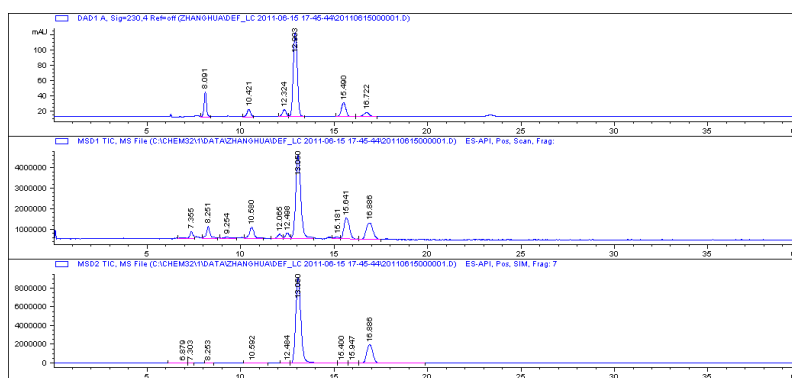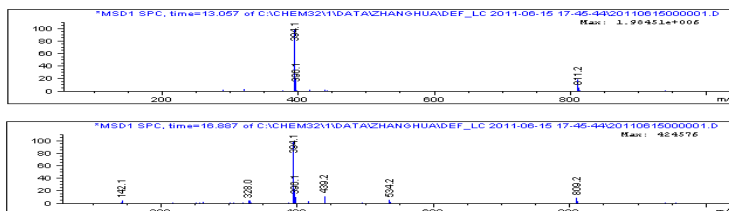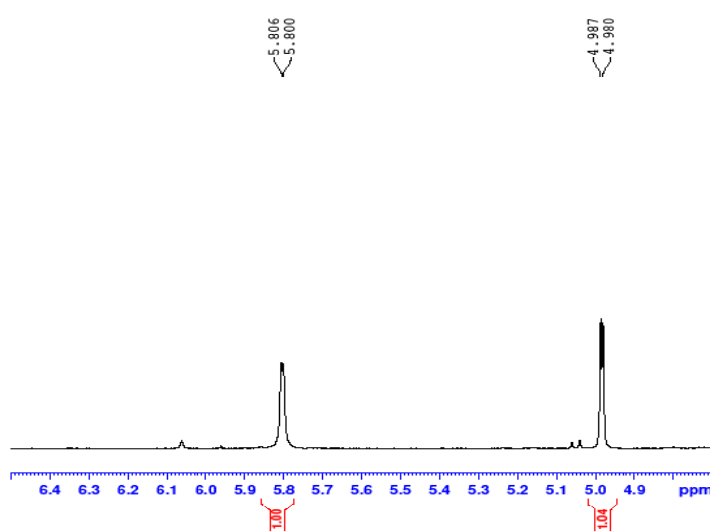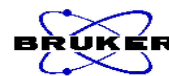

```

NAME      zhanghua2.1CHU
EXPNO     2
PROCNO    1
Date_     20110725
Time      16.53
INSTRUM   spect
PROBHD    5 mm F4BBO BB-
PULPROG   zg30
TD         65536
SOLVENT   CDCl3
NS         16
DS         2
SWH        8223.685 Hz
FIDRES     0.125483 Hz
AQ         3.9846387 sec
RG         144
DQ         60.000 usec
DE         6.50 usec
TE         296.3 K
D1         1.00000000 sec
TD0        1

===== CHANNEL f1 =====
NUC1       1H
P1         12.86 usec
PL1        -4.00 dB
PL1W       20.19063568 W
SFO1       400.1324710 MHz
SI         32768
SP         400.1300000 MHz
WDW        EM
SSB        0
LB         0.30 Hz
GB         0
PC         1.00
    
```

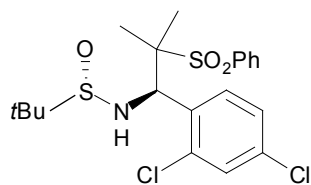

$C_{20}H_{25}Cl_2NO_3S_2$   
 Exact Mass: 461.07  
 Mol. Wt.: 462.45

**5b**

**5b**, rt = 19.59 min; **5b'**, = 26.70 min

**dr = 62.99 : 2.27 = 27 : 1**

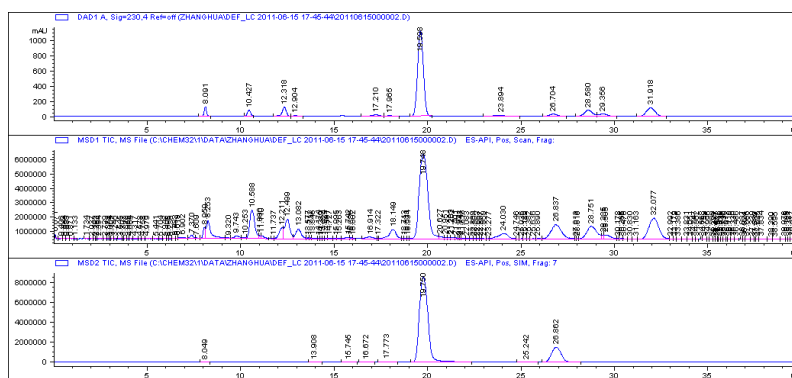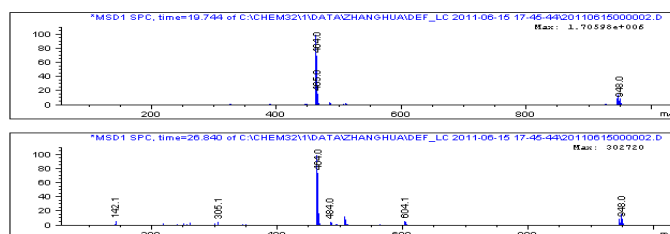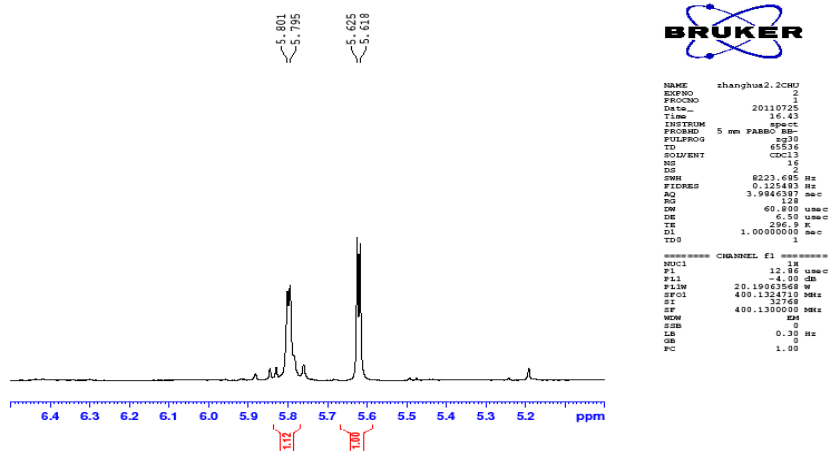

## Determination of the facial selectivity and isomer ratio for entry 3 and entry 4 (Table 2).

A mixture of diastereomers (ratio = 5 : 1 based on  $^1\text{H}$  NMR), derived from the reaction of **4b** and **2a**, was subject to reductive desulfonylation reaction using Mg/MeOH. Sulfinamide **6** was the single desulfonylated compound that could be detected by  $^1\text{H}$  NMR on the crude product, thus providing strong evidence that **5c** and **5c'** were produced by attack on the same face of imine **2a**. It should point out that (*E*)-(3-methylbut-1-enyl)benzene **7** was also obtained under the same reaction conditions.

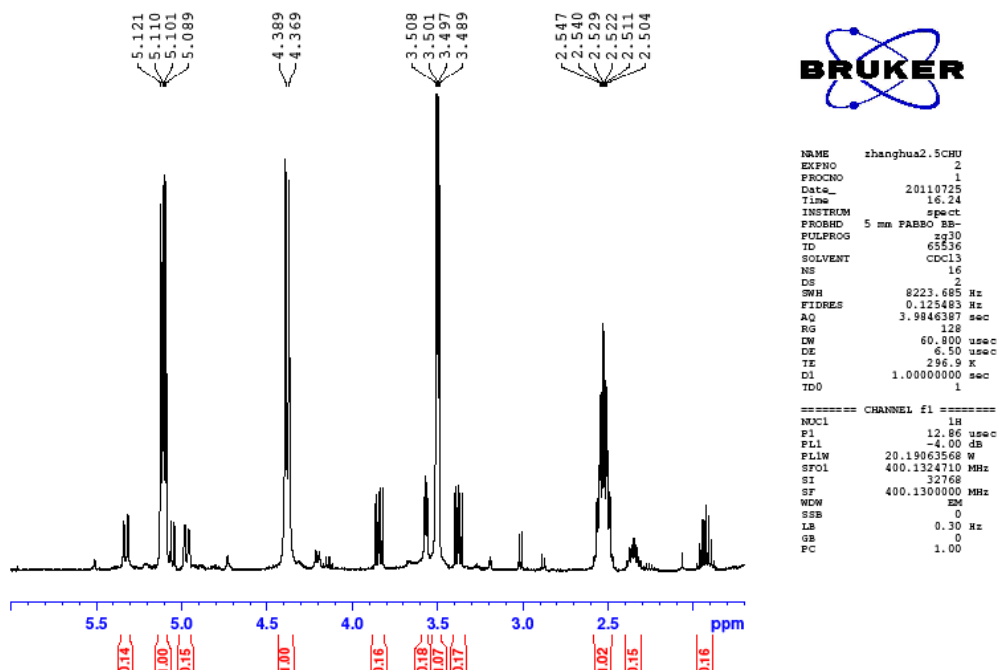

**Figure 3.**  $^1\text{H}$  NMR spectroscopy on a mixture of diastereomers (ratio = 5 : 1)

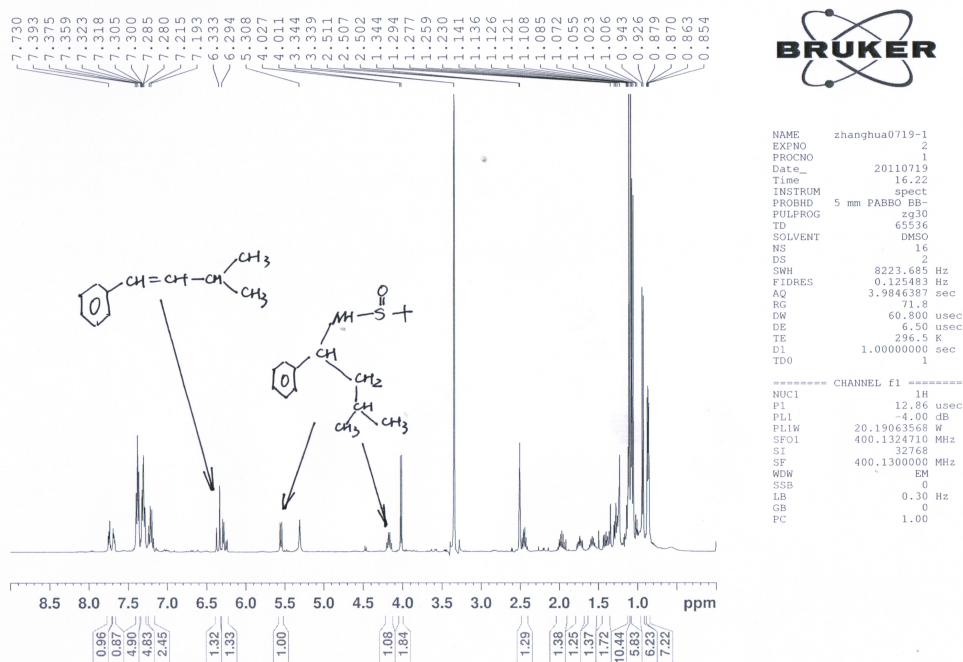

Figure 4. <sup>1</sup>H NMR spectroscopy on the crude product **6**

**5c**, rt = 13.33 min; **5c'**; rt = 15.50 min; **5c''**, rt=15.01 min; **5c'''**,rt=19.65 min

$$\text{Facial selectivity} = (64.24 + 21.72) : (0.04 + 1.43) = 60 : 1$$

$$\text{dr} = 64.24 : 21.72 = 3 : 1$$

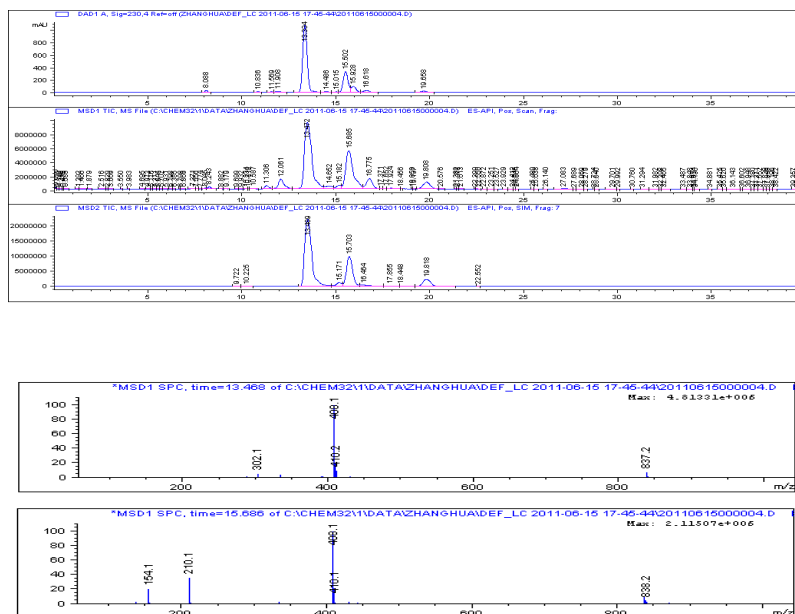

### Experimental details:

Into a 10-mL flask containing **5c** and **5c'** (183 mg, 0.45 mmol) in 5 mL anhydrous methanol at 0 °C, was added magnesium powder (3.6 mmol). The reaction mixture was stirred 1 h. Then 20 mL brine was added, followed by extracting with EtOAc. The combined organic phase was dried over MgSO<sub>4</sub>, and the solvent was removed to give product **6** (48 mg, 40 %) and (E)-(3-methylbut-1-enyl)benzene **7** (29 mg, 45 %).

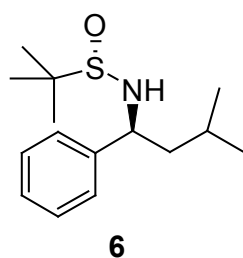

White solid, mp 65.3-66.5°C;  $[\alpha]_D^{25}$  -41.53(c =0.38, CHCl<sub>3</sub>); <sup>1</sup>H NMR (CDCl<sub>3</sub>): δ 7.37-7.21 (m, 5H), 5.54(d, J = 8.8 Hz, 1H), 4.17 (m, 1H), 1.72 (m, 1H), 1.57 (m, 1H), 1.40 (m, 1H), 1.10 (s, 9H), 0.85 (m, 6H); <sup>13</sup>C NMR (CDCl<sub>3</sub>): δ 145.2, 128.5, 127.3, 127.1, 58.7, 55.9, 47.7, 24.6, 23.1, 22.2; MALDI calcd. For C<sub>15</sub>H<sub>25</sub>NOSNa [M + Na]<sup>+</sup>: 290.1549, Found 290.1557.

yellow oil; <sup>1</sup>H NMR (CDCl<sub>3</sub>): δ 7.37-7.10 (m, 5H), 6.33 (d, J = 15.9 Hz, 1H), 6.18 (dd, J = 15.9, 6.6 Hz, 1H), 2.54-2.36 (m, 1H), 1.07 (d, J = 6.6 Hz, 6H); <sup>13</sup>C NMR (CDCl<sub>3</sub>): δ 138.2, 128.6, 128.3, 127.0, 126.9, 126.6, 126.1, 31.7, 22.6.

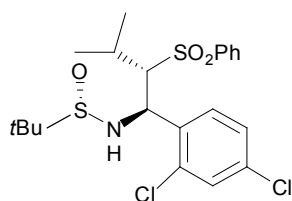

$C_{21}H_{27}Cl_2NO_3S_2$   
 Exact Mass: 475.08  
 Mol. Wt.: 476.48

**5d**

**5d**,  $r_t = 17.88$  min; **5d'**,  $r_t = 26.84$  min; **5d''**,  $r_t = 20.14$  min; **5d'''**,  $r_t = 35.06$  min

**Facial selectivity = (54.16+10.85): (0.04+ 0.86)=75 : 1**

**dr =54.16:10.85= 5 : 1**

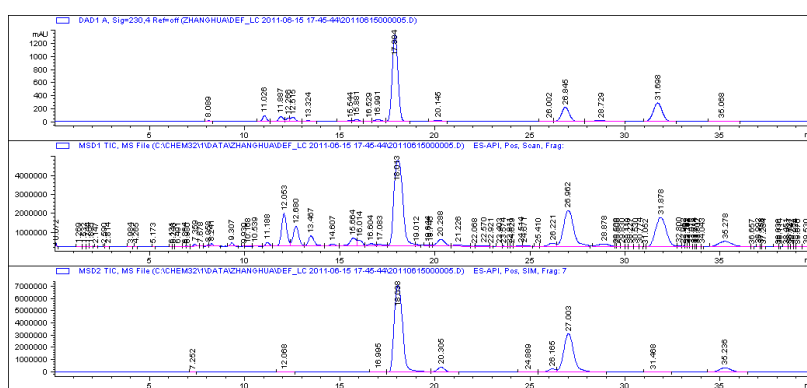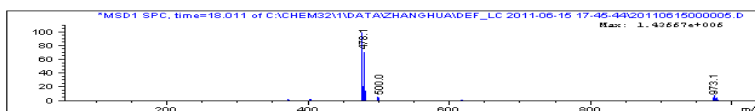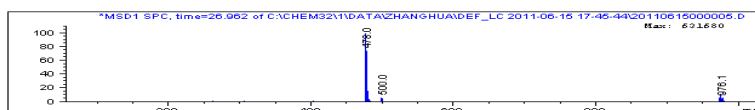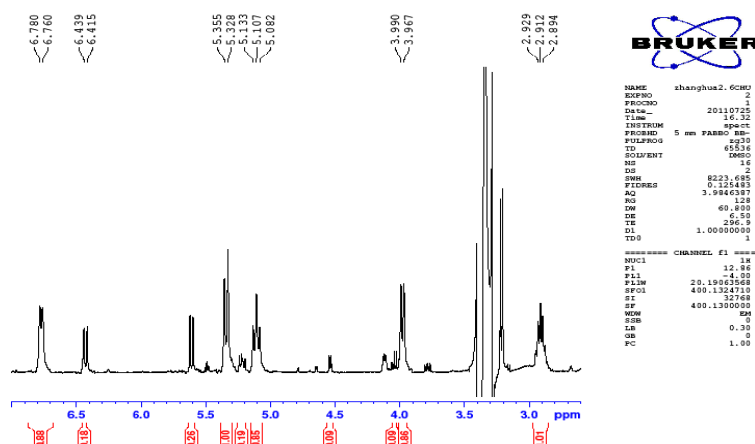



## Computational studies for the transition state of the reaction between compound **2a** and **4b**

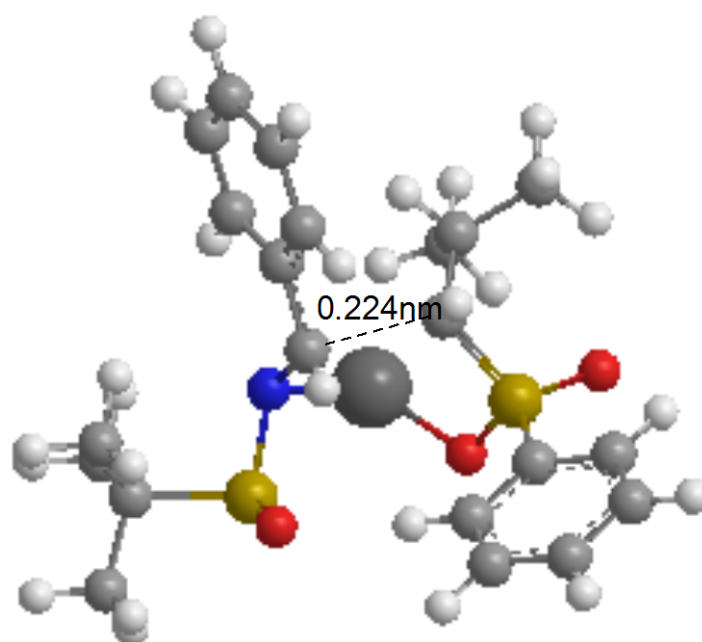

Geometry optimizations of molecules and transition state were performed at the standard B3LYP/6-31G(d) level. The frequency calculations at the same level provided thermodynamic and zero-point energy corrections at -80°C. Single point energies were then calculated at the B3LYP/6-311++G(2df,2p) level. The calculations were performed with the Gaussian 03 programs.[1]

In the transition state(Figure 1c) the forming C-C bond length is 0.224 nm and the free energy of activation for the formation of the transition state ( $\Delta G^\ddagger$ ) is 68.5 kJ/mol calculated at -80°C.

reference:

[1] M. J. Frisch, G. W. Trucks, H. B. Schlegel, G. E. Scuseria, M. A. Robb, J. R. Cheeseman, J. A. Montgomery, Jr., T. Vreven, K. N. Kudin, J. C. Burant, J. M.

Millam, S. S. Iyengar, J. Tomasi, V. Barone, B. Mennucci, M. Cossi, G. Scalmani, N. Rega, G. A. Petersson, H. Nakatsuji, M. Hada, M. Ehara, K. Toyota, R. Fukuda, J. Hasegawa, M. Ishida, T. Nakajima, Y. Honda, O. Kitao, H. Nakai, M. Klene, X. Li, J. E. Knox, H. P. Hratchian, J. B. Cross, C. Adamo, J. Jaramillo, R. Gomperts, R. E. Stratmann, O. Yazyev, A. J. Austin, R. Cammi, C. Pomelli, J. W. Ochterski, P. Y. Ayala, K. Morokuma, G. A. Voth, P. Salvador, J. J. Dannenberg, V. G. Zakrzewski, S. Dapprich, A. D. Daniels, M. C. Strain, O. Farkas, D. K. Malick, A. D. Rabuck, K. Raghavachari, J. B. Foresman, J. V. Ortiz, Q. Cui, A. G. Baboul, S. Clifford, J. Cioslowski, B. B. Stefanov, G. Liu, A. Liashenko, P. Piskorz, I. Komaromi, R. L. Martin, D. J. Fox, T. Keith, M. A. Al-Laham, C. Y Peng, A. Nanayakkara, M. Challa-combe, P. M. W. Gill, B. Johnson, W. Chen, M. W. Wong, C. Gonzalez, J. A. Pople, Gaussian 03, Revision B01, Gaussian, Inc., Pittsburgh, PA, 2003.

## NMR spectra for all products

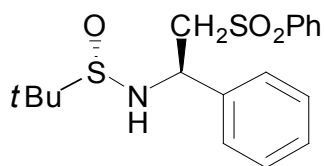

**3a** ( $^1\text{H}$  NMR and  $^{13}\text{C}$  NMR)

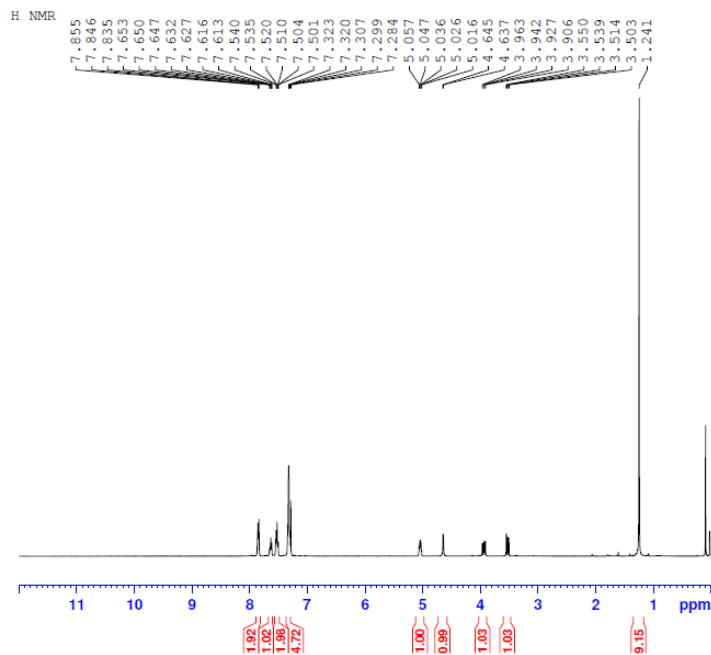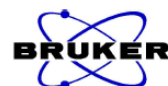

```

NAME zhanghua1.1-H
EXPNO 1
PROCNO 1
Date_ 20110411
Time 12.20
INSTRUM spect
PROBHD 5 mm PABBO BB-
PULPROG zg30
TD 65536
SOLVENT CDCl3
NS 16
DS 2
SWH 8223.685 Hz
FIDRES 0.125483 Hz
AQ 3.9846387 sec
RG 344
DW 60.800 usec
DE 6.50 usec
TE 296.9 K
D1 1.00000000 sec
TDO 1

----- CHANNEL f1 -----
NUC1 1H
P1 11.10 usec
PL1 -4.00 dB
PL1W 20.19063568 W
SFO1 400.1324710 MHz
SI 32768
SF 400.1300000 MHz
WDW EM
SSB 0
LB 0.30 Hz
GB 0
PC 1.00
    
```

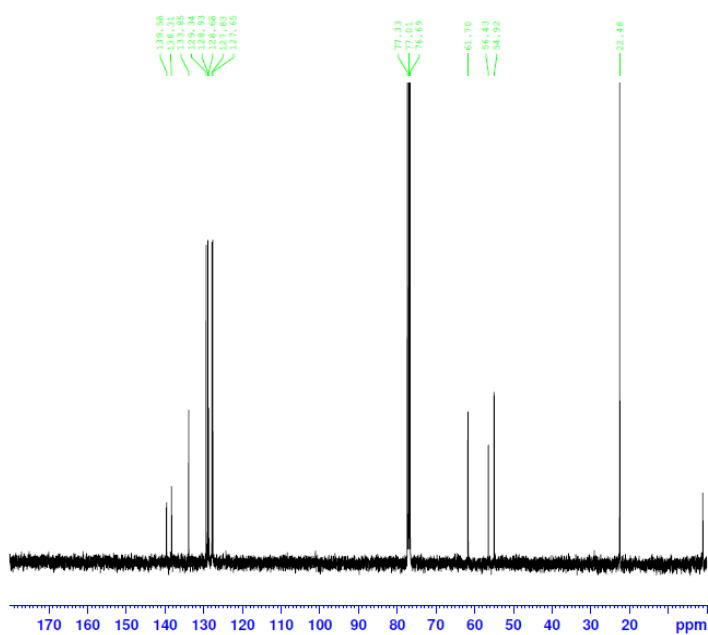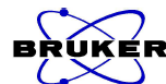

```

NAME zhanghua1.1--C
EXPNO 1
PROCNO 1
Date_ 20110412
Time 14.44
INSTRUM spect
PROBHD 5 mm PABBO BB-
PULPROG zgpg30
TD 65536
SOLVENT CDCl3
NS 696
DS 4
SWH 24038.461 Hz
FIDRES 0.366798 Hz
AQ 1.3631988 sec
RG 1290
DW 20.800 usec
DE 6.50 usec
TE 300.2 K
D1 2.00000000 sec
D11 0.03000000 sec
TDO 1

----- CHANNEL f1 -----
NUC1 13C
P1 9.30 usec
PL1 -3.00 dB
PL1W 64.15196228 W
SFO1 100.6228298 MHz

----- CHANNEL f2 -----
CPDPRG2 waitz16
NUC2 1H
PCPD2 80.00 usec
PL2 -4.00 dB
PL2 13.16 dB
PL13 12.00 dB
PL2W 20.19063568 W
PL12W 0.3828444 W
PL13W 0.50716585 W
SFO2 400.1316005 MHz
SI 32768
SF 100.6127690 MHz
WDW EM
SSB 0
LB 1.00 Hz
GB 0
PC 1.40
    
```

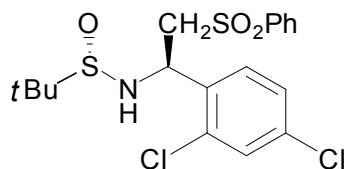

**3b** ( $^1\text{H}$  NMR and  $^{13}\text{C}$  NMR)

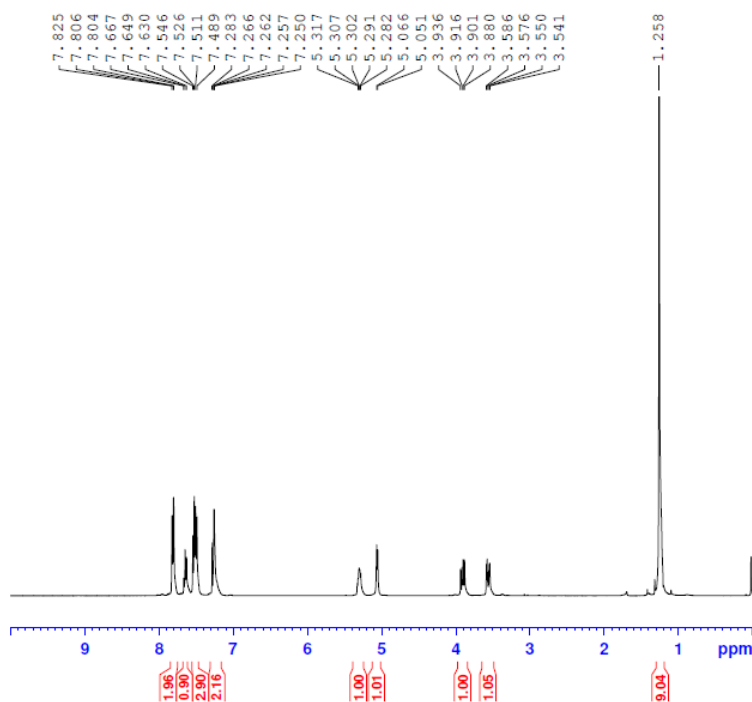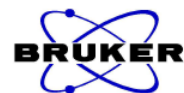

```

NAME      zhanghual.4-H
EXPNO     1
PROCNO    1
Date_     20110417
Time      9.38
INSTRUM   spect
PROBHD    5 mm PABBO BB-
PULPROG   zg30
TD         65536
SOLVENT   CDCl3
NS         16
DS         2
SWH        8223.685 Hz
FIDRES     0.125483 Hz
AQ         3.9846387 sec
RG         114
DW         60.800 usec
DE         6.50 usec
TE         298.1 K
D1         1.00000000 sec
TDO        1
    
```

```

CHANNEL f1
-----
NUC1      1H
P1        11.10 usec
PL1       -4.00 dB
PL1W      20.190635668 W
SFO1      400.1324710 MHz
SI        32768
SF         400.1300000 MHz
WDW       EM
SSB        0
LB         0.30 Hz
GB         0
PC         1.00
    
```

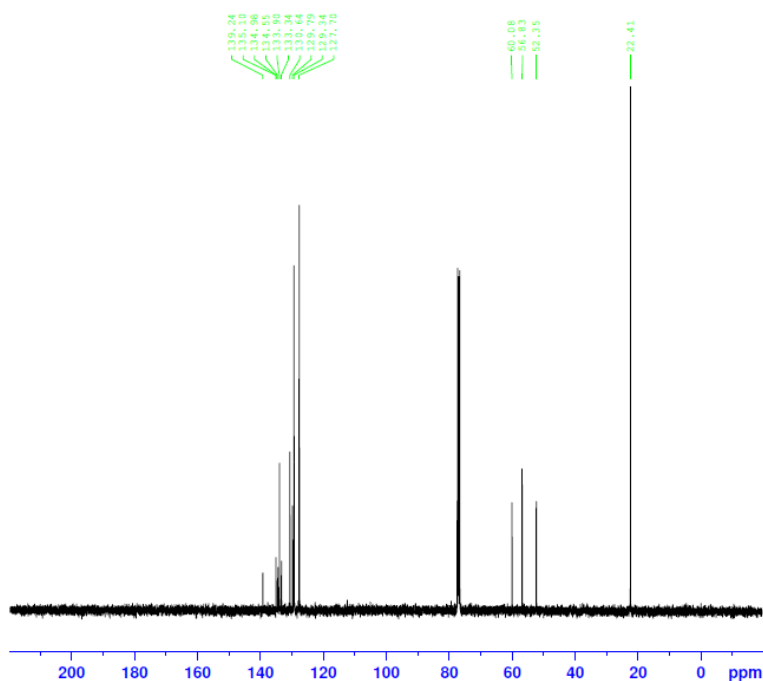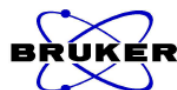

```

NAME      zhanghual.4-C
EXPNO     1
PROCNO    1
Date_     20110417
Time      10.07
INSTRUM   spect
PROBHD    5 mm PABBO BB-
PULPROG   zgpg30
TD         65536
SOLVENT   CDCl3
NS         368
DS         4
SWH        24038.461 Hz
FIDRES     0.366798 Hz
AQ         1.3631988 sec
RG         1290
DW         20.800 usec
DE         6.50 usec
TE         300.1 K
D1         2.00000000 sec
D11        0.03000000 sec
TDO        1
    
```

```

CHANNEL f1
-----
NUC1      13C
P1         9.30 usec
PL1        -3.00 dB
PL1W       64.151962228 W
SFO1      100.6228298 MHz
    
```

```

CHANNEL f2
-----
CPDPRG2   waitz16
NUC2      1H
PCPD2     80.00 usec
PL2        -4.00 dB
PL12       13.16 dB
PL13       12.00 dB
PL1W      20.190635668 W
PL12W     0.38828444 W
PL13W     0.50716585 W
SFO2      400.1316005 MHz
SI        32768
SF         100.6127690 MHz
WDW       EM
SSB        0
LB         1.00 Hz
GB         0
PC         1.40
    
```

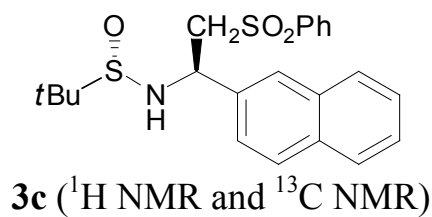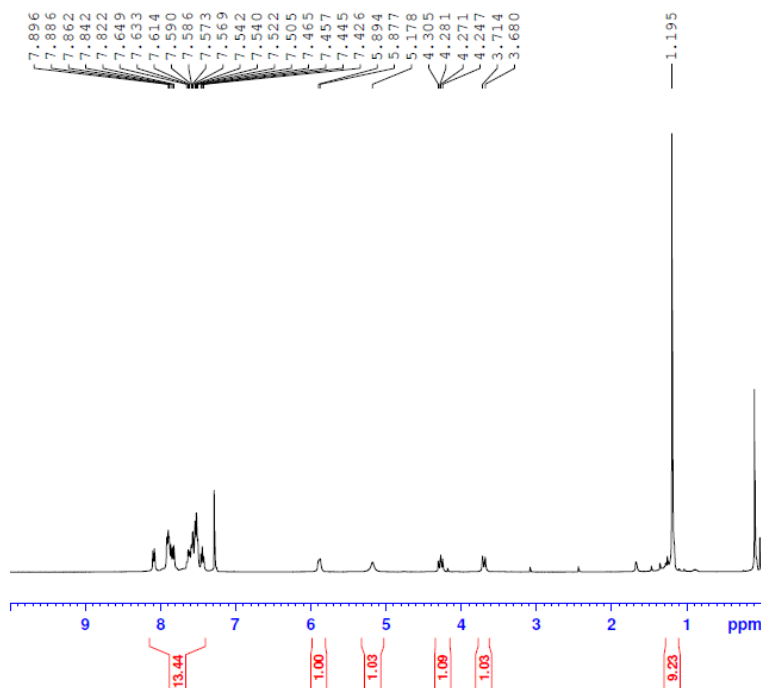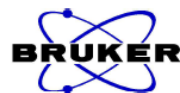

```

NAME      zhanghua1.5-H
EXPNO    1
PROCNO   1
Date_    20110407
Time     18.44
INSTRUM  spect
PROBHD   5 mm PABBO BB-
PULPROG  zg30
TD       65536
SOLVENT  CDCl3
NS       16
DS       2
SWH      8223.685 Hz
FIDRES   0.125483 Hz
AQ       3.9846387 sec
RG       144
DW       60.800 usec
DE       6.50 usec
TE       295.8 K
D1       1.00000000 sec
TD0     1

----- CHANNEL f1 -----
NUC1     1H
P1       11.10 usec
PL1      -1.00 dB
PL1W     20.19063568 W
SFO1     400.1324710 MHz
SI       32768
SF       400.1300000 MHz
WDW      EM
SSB      0
LB       0.30 Hz
GB       0
PC       1.00
    
```

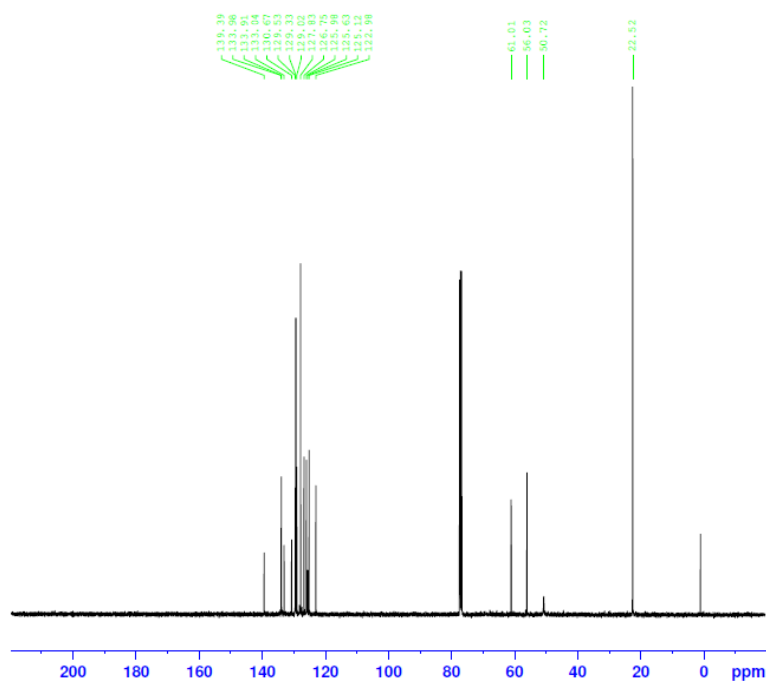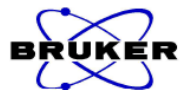

```

NAME      zhanghua1.5r-C
EXPNO    1
PROCNO   1
Date_    20110411
Time     21.16
INSTRUM  spect
PROBHD   5 mm PABBO BB-
PULPROG  zgpg30
TD       65536
SOLVENT  CDCl3
NS       680
DS       4
SWH      24038.461 Hz
FIDRES   0.366798 Hz
AQ       1.3631988 sec
RG       1030
DW       20.800 usec
DE       6.50 usec
TE       299.4 K
D1       2.00000000 sec
D11     0.03000000 sec
TD0     1

----- CHANNEL f1 -----
NUC1     13C
P1       9.30 usec
PL1      -3.00 dB
PL1W     64.15196228 W
SFO1     100.6228298 MHz

----- CHANNEL f2 -----
CPDPRG2  waltz16
NUC2     1H
PCPD2    80.00 usec
PL2      -4.00 dB
PL12     13.16 dB
PL13     12.00 dB
PL2W     20.19063568 W
PL12W    0.38828444 W
PL13W    0.50716595 W
SFO2     400.1316005 MHz
SI       32768
SF       100.6127690 MHz
WDW      EM
SSB      0
LB       1.00 Hz
GB       0
PC       1.40
    
```

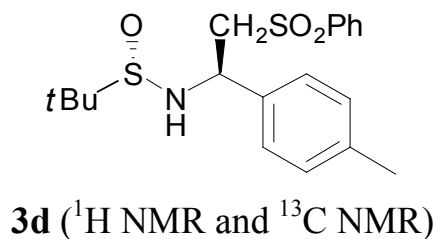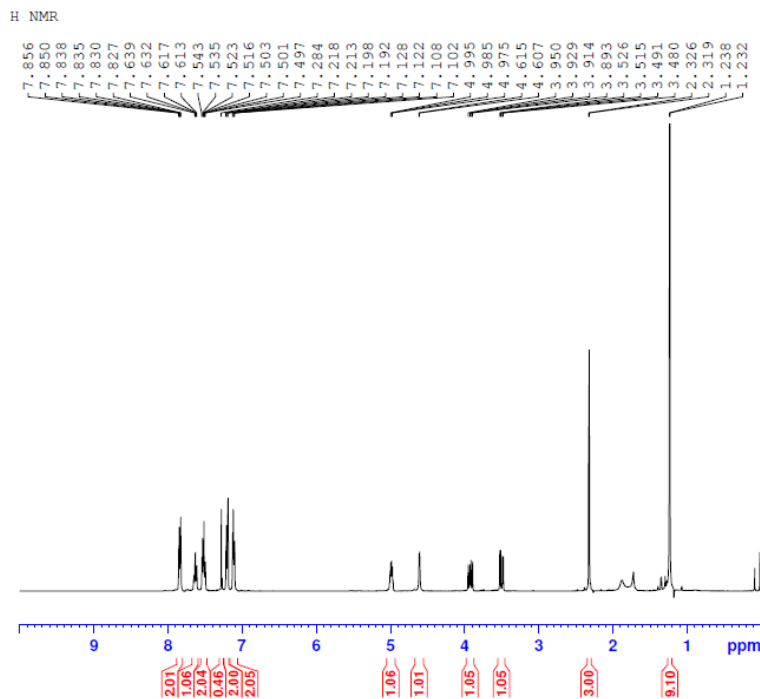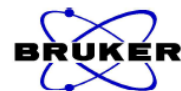

```

NAME      zhanghua1.3-H
EXPNO    1
PROCNO   1
Date_    20110411
Time     12.06
INSTRUM  spect
PROBHD   5 mm PABBO BB-
PULPROG  zg30
TD       65536
SOLVENT  CDCl3
NS       16
DS       2
SWH      8223.685 Hz
FIDRES   0.125483 Hz
AQ       3.9846387 sec
RG       114
DW       60.800 usec
DE       6.50 usec
TE       296.9 K
D1       1.0000000 sec
TDO      1
    
```

```

----- CHANNEL f1 -----
NUC1     1H
P1       11.10 usec
PL1     -4.00 dB
PL1W    20.19063568 W
SFO1    400.1324710 MHz
SI      32768
SF      400.1300000 MHz
WDW     EM
SSB     0
LB      0.30 Hz
GB      0
PC      1.00
    
```

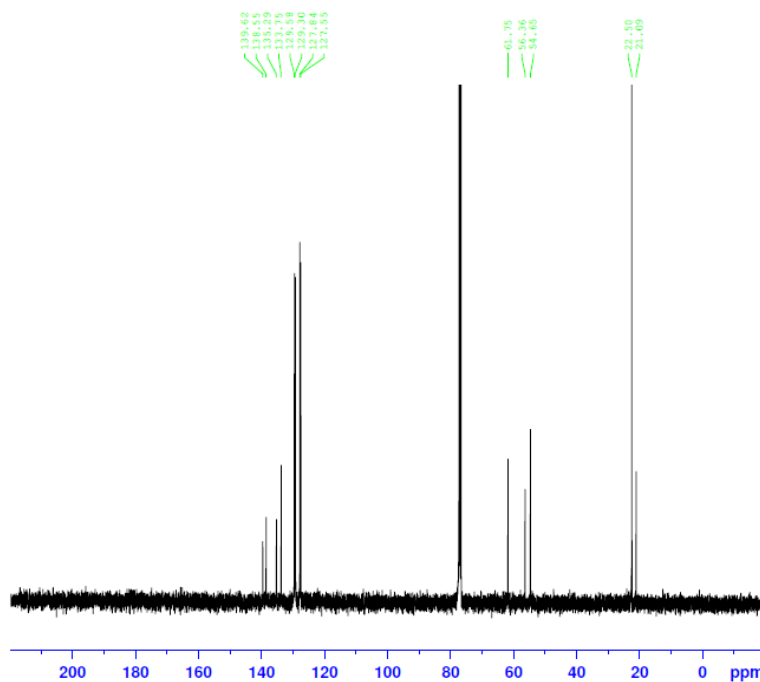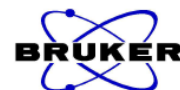

```

NAME      zhanghua1.3-C
EXPNO    1
PROCNO   1
Date_    20110412
Time     15.14
INSTRUM  spect
PROBHD   5 mm PABBO BB-
PULPROG  zgpg30
TD       65536
SOLVENT  CDCl3
NS       320
DS       4
SWH      24038.461 Hz
FIDRES   0.366798 Hz
AQ       1.3631988 sec
RG       724
DW       20.800 usec
DE       6.50 usec
TE       299.9 K
D1       2.0000000 sec
D11     0.0300000 sec
TDO      1
    
```

```

----- CHANNEL f1 -----
NUC1     13C
P1       9.30 usec
PL1     -3.00 dB
PL1W    64.15196228 W
SFO1    100.6228298 MHz

----- CHANNEL f2 -----
CPDPRG2  waltz16
NUC2     1H
PCPD2   80.00 usec
PL2     -4.00 dB
PL12    13.16 dB
PL13    12.00 dB
PL2W    20.19063568 W
PL12W   0.3882844 W
PL13W   0.50716585 W
SFO2    400.1316005 MHz
SI      32768
SF      100.6127690 MHz
WDW     EM
SSB     0
LB      1.00 Hz
GB      0
PC      1.40
    
```

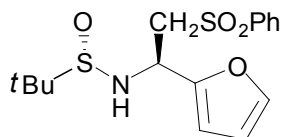

**3e** ( $^1\text{H}$  NMR and  $^{13}\text{C}$  NMR)

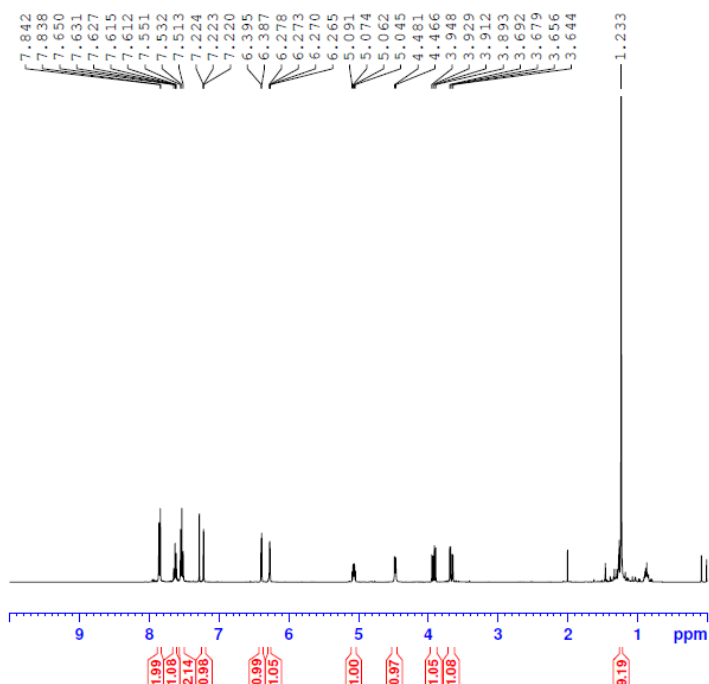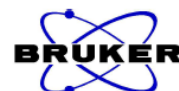

```

NAME zhanghua1.6--H
EXPNO 1
PROCNO 1
Date_ 20110417
Time 11.01
INSTRUM spect
PROBHD 5 mm PABBO BB-
PULPROG zg30
TD 65536
SOLVENT CDCl3
NS 16
DS 2
SWH 8223.685 Hz
FIDRES 0.125483 Hz
AQ 3.9846387 sec
RG 80.6
DW 60.800 usec
DE 6.50 usec
TE 298.6 K
D1 1.00000000 sec
TD0 1

----- CHANNEL f1 -----
NUC1 1H
P1 11.10 usec
PL1 -4.00 dB
PL1W 20.19063568 W
SFO1 400.1324710 MHz
SI 32768
SF 400.1300000 MHz
WDW EM
SSB 0
LB 0.30 Hz
GB 0
PC 1.00
    
```

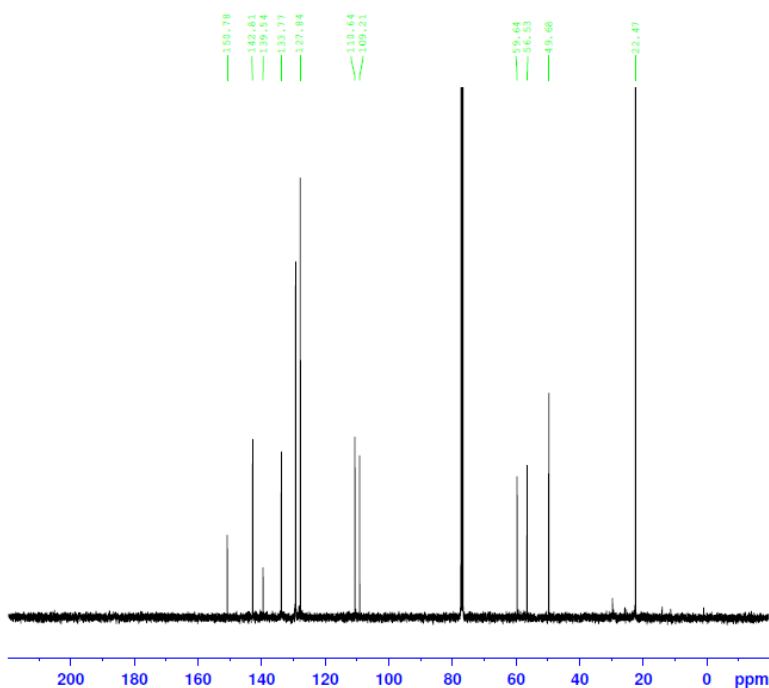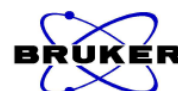

```

NAME zhanghua1.6-H
EXPNO 1
PROCNO 1
Date_ 20110417
Time 10.53
INSTRUM spect
PROBHD 5 mm PABBO BB-
PULPROG zgpg30
TD 65536
SOLVENT CDCl3
NS 296
DS 4
SWH 24038.461 Hz
FIDRES 0.366798 Hz
AQ 1.3631988 sec
RG 812
DW 20.800 usec
DE 6.50 usec
TE 300.1 K
D1 2.00000000 sec
D11 0.03000000 sec
TD0 1

----- CHANNEL f1 -----
NUC1 13C
P1 9.30 usec
PL1 -3.00 dB
PL1W 64.15196228 W
SFO1 100.6228298 MHz

----- CHANNEL f2 -----
CPDPRG2 waitz16
NUC2 1H
PCPD2 80.00 usec
PL2 -4.00 dB
PL12 13.16 dB
PL13 12.00 dB
PL2W 20.19063568 W
PL12W 0.38828444 W
PL13W 0.50716585 W
SFO2 400.1316005 MHz
SI 32768
SF 100.6127690 MHz
WDW EM
SSB 0
LB 1.00 Hz
GB 0
PC 1.40
    
```

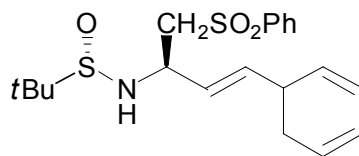

**3f** ( $^1\text{H}$  NMR and  $^{13}\text{C}$  NMR)

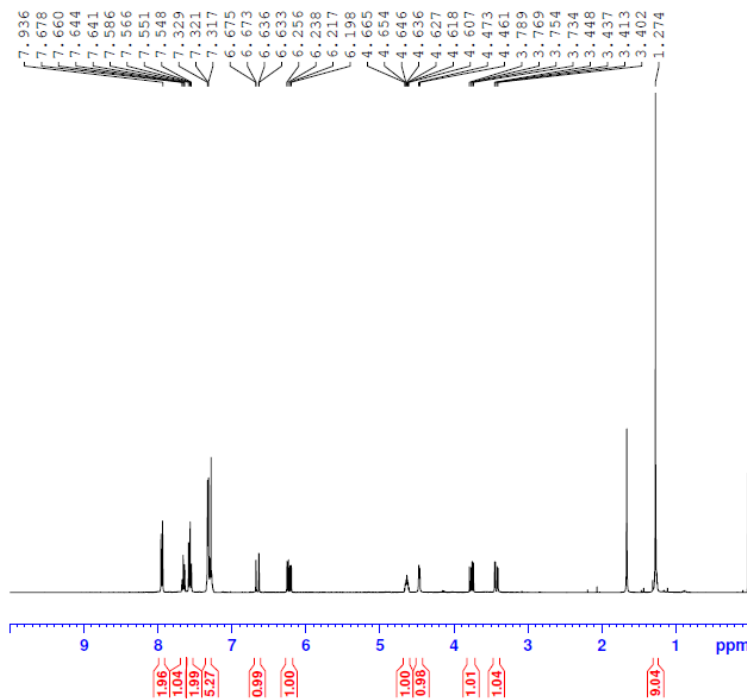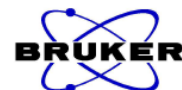

```

NAME      zhanghua1.7-h
EXPNO    1
PROCNO   1
Date_    20110407
Time     19.43
INSTRUM  spect
PROBHD   5 mm PABBO BB-
PULPROG  zg30
TD       65536
SOLVENT  CDCl3
NS       16
DS       2
SWH      8223.685 Hz
FIDRES   0.125483 Hz
AQ       3.9846387 sec
RG       181
DW       60.800 usec
DE       6.50 usec
TE       295.8 K
D1       1.00000000 sec
TD0      1

----- CHANNEL f1 -----
NUC1     1H
P1       11.10 usec
PL1      -4.00 dB
PL1W     20.19063568 W
SFO1     400.1324710 MHz
SI       32768
SF       400.1300000 MHz
WDW      EM
SSB      0
LB       0.30 Hz
GB       0
PC       1.00
    
```

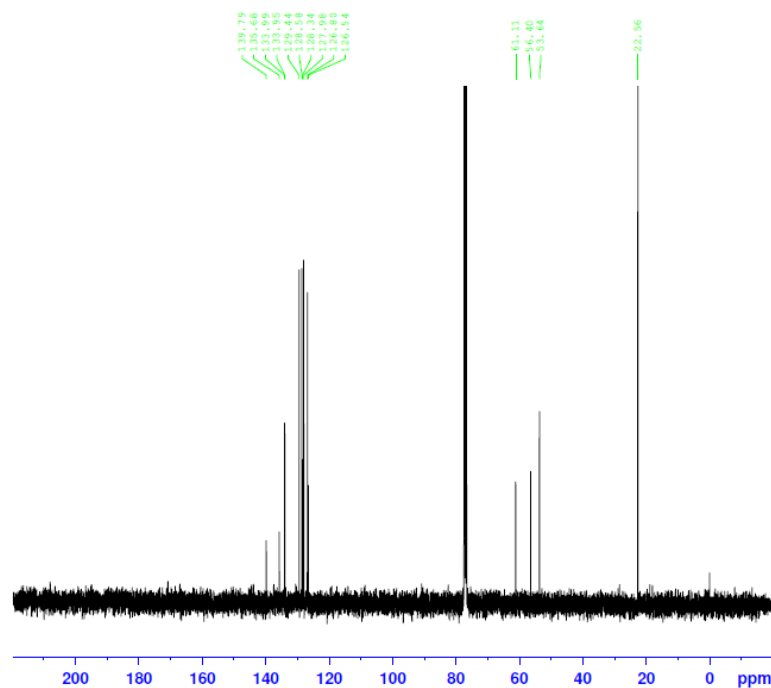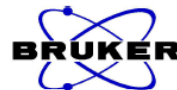

```

NAME      zhanghua1.7-C
EXPNO    1
PROCNO   1
Date_    20110411
Time     19.07
INSTRUM  spect
PROBHD   5 mm PABBO BB-
PULPROG  zgpg30
TD       65536
SOLVENT  CDCl3
NS       472
DS       4
SWH      24038.461 Hz
FIDRES   0.366798 Hz
AQ       1.3631988 sec
RG       1290
DW       20.800 usec
DE       6.50 usec
TE       295.7 K
D1       2.00000000 sec
D11      0.03000000 sec
TD0      1

----- CHANNEL f1 -----
NUC1     13C
P1       9.30 usec
PL1      -3.00 dB
PL1W     64.15196228 W
SFO1     100.6228298 MHz

----- CHANNEL f2 -----
CPDPRG2  waltz16
NUC2     1H
PCPD2    80.00 usec
PL2      -4.00 dB
PL12     13.16 dB
PL13     12.00 dB
PL2W     20.19063568 W
PL12W    0.38828444 W
PL13W    0.50716585 W
SFO2     400.1316005 MHz
SI       32768
SF       100.6127690 MHz
WDW      EM
SSB      0
LB       1.00 Hz
GB       0
PC       1.40
    
```



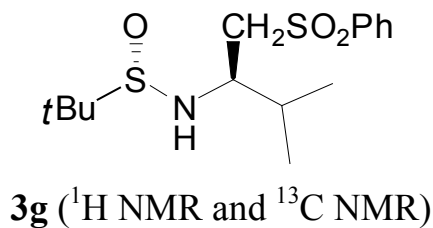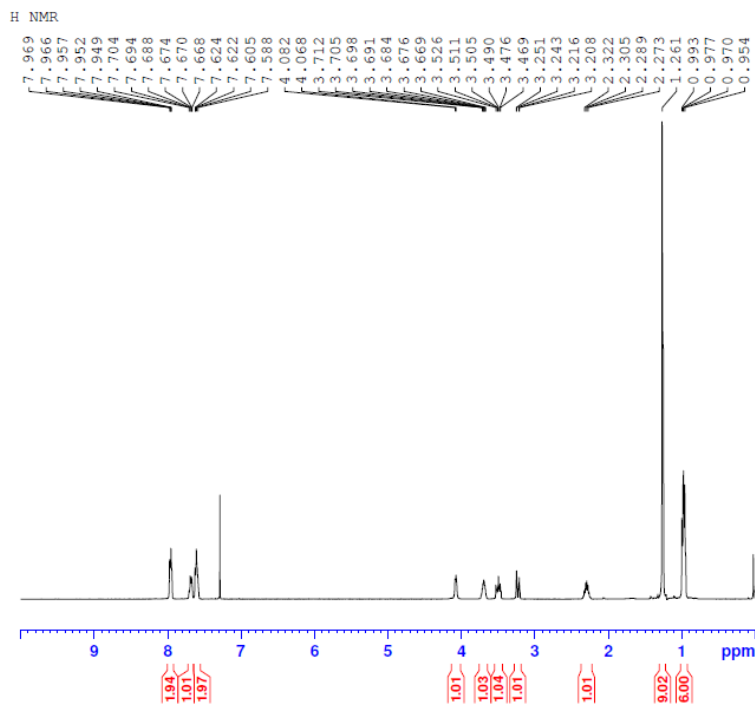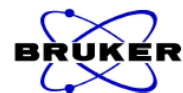

```

NAME      zhanghua2.7-H
EXPNO     1
PROCNO    1
Date_     20110411
Time      13.10
INSTRUM   spect
PROBHD    5 mm PABBO BB-
PULPROG   zg30
ID         65536
SOLVENT   CDCl3
NS         16
DS         4
SWH        8223.685 Hz
FIDRES     0.125483 Hz
AQ         3.9846397 sec
RG         144
DW         60.800 usec
DE         6.50 usec
TE         297.1 K
D1         1.00000000 sec
TD0        1

----- CHANNEL f1 -----
NUC1      1H
P1         11.10 usec
PL1        -4.00 dB
PL1W      20.19063568 W
SF01      400.1324710 MHz
SI         32768
SF         400.1300000 MHz
WDW        EM
SSB        0
LB         0.30 Hz
GB         0
PC         1.00
    
```

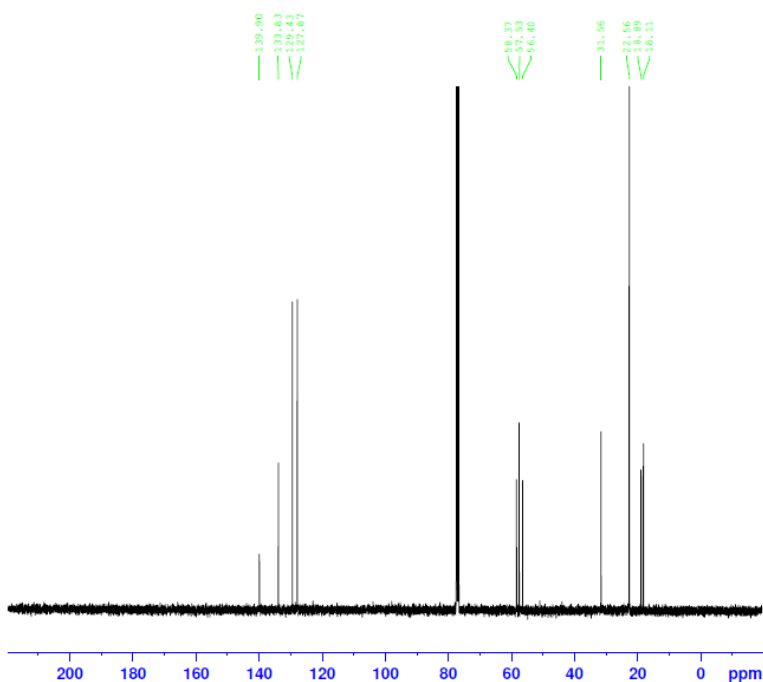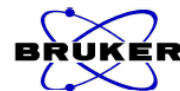

```

NAME      zhanghua2.7-C
EXPNO     1
PROCNO    1
Date_     20110411
Time      20.51
INSTRUM   spect
PROBHD    5 mm PABBO BB-
PULPROG   zgpg30
ID         65536
SOLVENT   CDCl3
NS         512
DS         4
SWH        24038.461 Hz
FIDRES     0.366798 Hz
AQ         1.3631988 sec
RG         1030
DW         20.800 usec
DE         6.50 usec
TE         299.6 K
D1         2.00000000 sec
D11        0.03000000 sec
TD0        1

----- CHANNEL f1 -----
NUC1      13C
P1         9.30 usec
PL1        -3.00 dB
PL1W      64.15196228 W
SF01      100.6228298 MHz

----- CHANNEL f2 -----
CPDPRG2   waltz16
NUC2      1H
PCPD2     80.00 usec
PL2        -4.00 dB
PL12      13.16 dB
PL13      12.00 dB
PL2W      20.19063568 W
PL12W     0.38828444 W
PL13W     0.50716585 W
SF02      400.1316005 MHz
SI         32768
SF         100.6127690 MHz
WDW        EM
SSB        0
LB         1.00 Hz
GB         0
PC         1.40
    
```

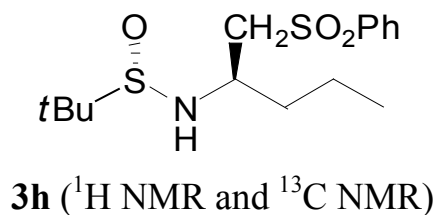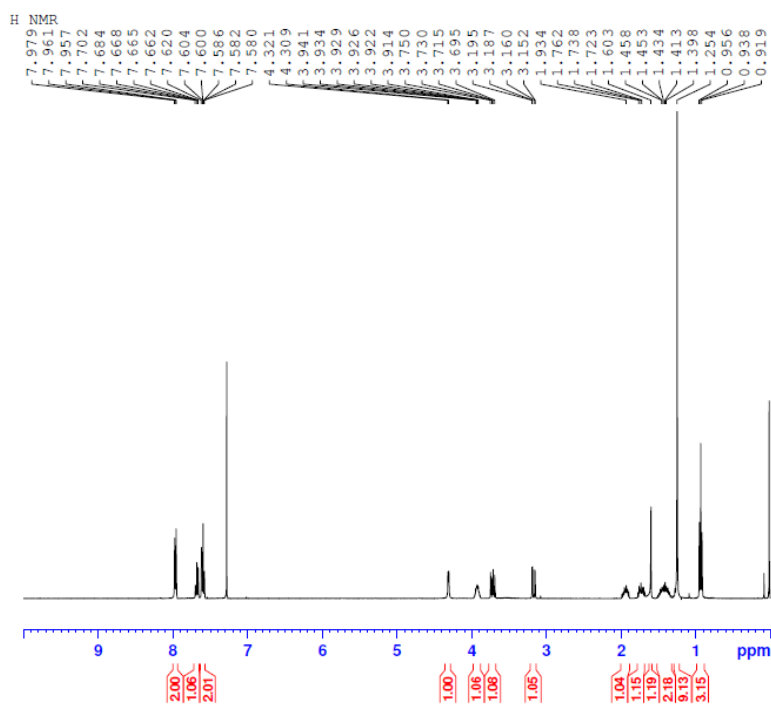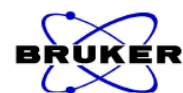

```

NAME      zhanghua2.8-h
EXPNO     1
PROCNO    1
Date_     20110411
Time      13.22
INSTRUM   spect
PROBHD    5 mm PABBO BB-
PULPROG   zg30
TD         65536
SOLVENT   CDCl3
NS         16
DS         2
SWH        8223.695 Hz
FIDRES     0.125483 Hz
AQ         3.9846387 sec
RG         362
DW         60.800 usec
DE         6.50 usec
TE         297.2 K
D1         1.0000000 sec
TD0
    
```

```

----- CHANNEL f1 -----
NUC1      1H
P1        11.10 usec
PL1       -4.00 dB
PL1W      20.19063568 W
SFO1      400.1324710 MHz
SI        32768
SF        400.1300000 MHz
WDW       EM
SSB       0
LB        0.30 Hz
GB        0
PC        1.00
    
```

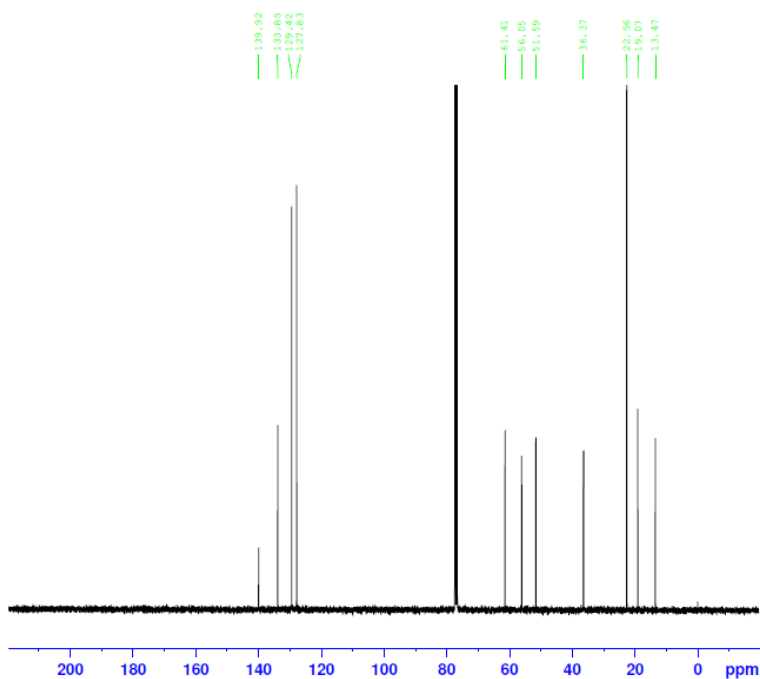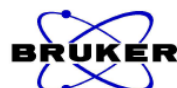

```

NAME      zhanghua2.8-c
EXPNO     1
PROCNO    1
Date_     20110411
Time      22.28
INSTRUM   spect
PROBHD    5 mm PABBO BB-
PULPROG   zgpg30
TD         65536
SOLVENT   CDCl3
NS         696
DS         4
SWH        24038.461 Hz
FIDRES     0.366798 Hz
AQ         1.3631988 sec
RG         1440
DW         20.800 usec
DE         6.50 usec
TE         299.4 K
D1         2.0000000 sec
D11        0.03000000 sec
TD0        1
    
```

```

----- CHANNEL f1 -----
NUC1      13C
P1        9.30 usec
PL1       -3.00 dB
PL1W      64.15196228 W
SFO1      100.6228298 MHz

----- CHANNEL f2 -----
CPDPRG2   waltz16
NUC2      1H
PCPD2     80.00 usec
PL2       -4.00 dB
PL12      13.16 dB
PL13      12.00 dB
PL2W      20.19063568 W
PL12W     0.38828444 W
PL13W     0.50716585 W
SFO2      400.1316005 MHz
SI        32768
SF        100.6127690 MHz
WDW       EM
SSB       0
LB        1.00 Hz
GB        0
PC        1.40
    
```

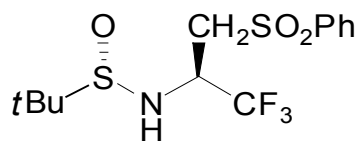

**3i** ( $^1\text{H}$  NMR,  $^{13}\text{C}$  NMR and  $^{19}\text{F}$  NMR)

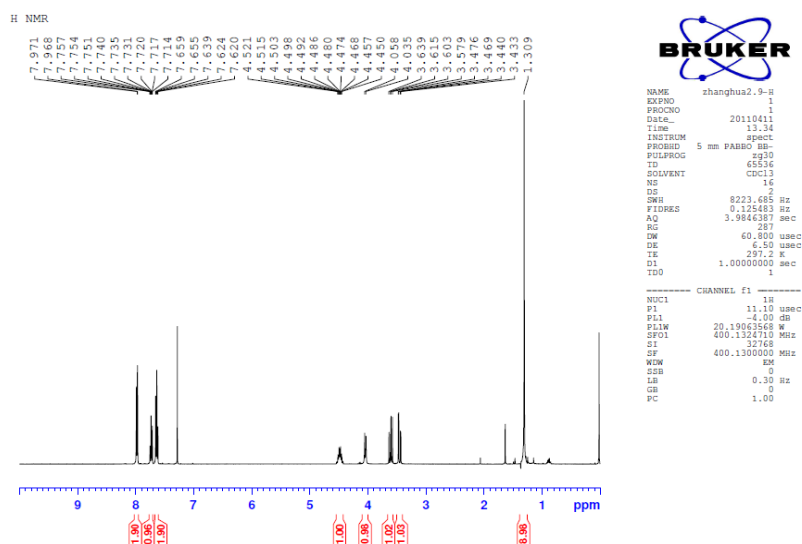

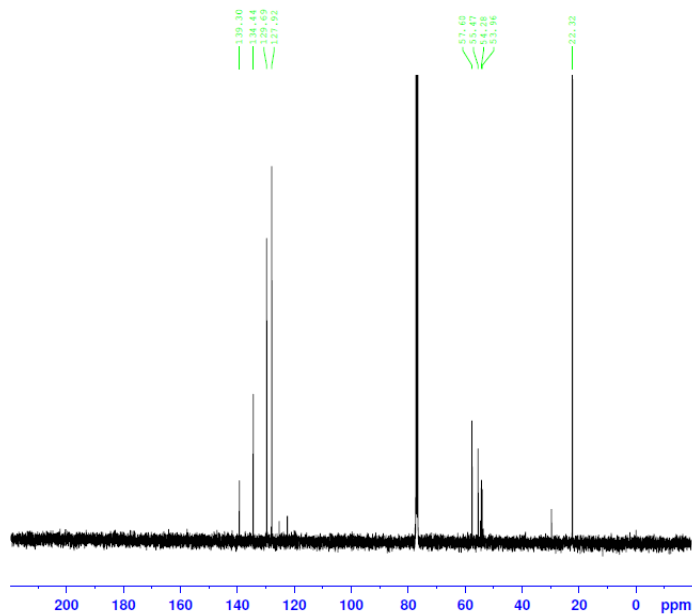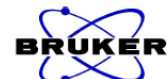

```

NAME      zhanghua2.9--C
EXPNO     1
PROCNO    1
Date_     20110412
Time      16.07
INSTRUM   spect
PROBHD    5 mm PABBO BB-
PULPROG   zgpg30
TD         65536
SOLVENT   CDCl3
NS         824
DS         4
SWH       24038.461 Hz
FIDRES    0.366798 Hz
AQ         1.3631988 sec
RG         575
DW         20.800 usec
DE         6.50 usec
TE         299.5 K
D1         2.0000000 sec
D11        0.0300000 sec
TDO        1

===== CHANNEL f1 =====
NUC1       13C
P1         9.30 usec
PL1        -3.00 dB
PL1W       64.15196228 W
SFO1       100.6228298 MHz

===== CHANNEL f2 =====
CPDPRG2    waitz16
NUC2        1H
PCPD2       80.00 usec
PL2         -4.00 dB
PL12        13.16 dB
PL13        12.00 dB
PL1W        20.19063568 W
PL12W       0.38828444 W
PL13W       0.50716585 W
SFO2       400.1316035 MHz
SI          32768
SF         100.6127690 MHz
WDW         EM
SSB         0
LB          1.00 Hz
GB          0
PC          1.40
    
```

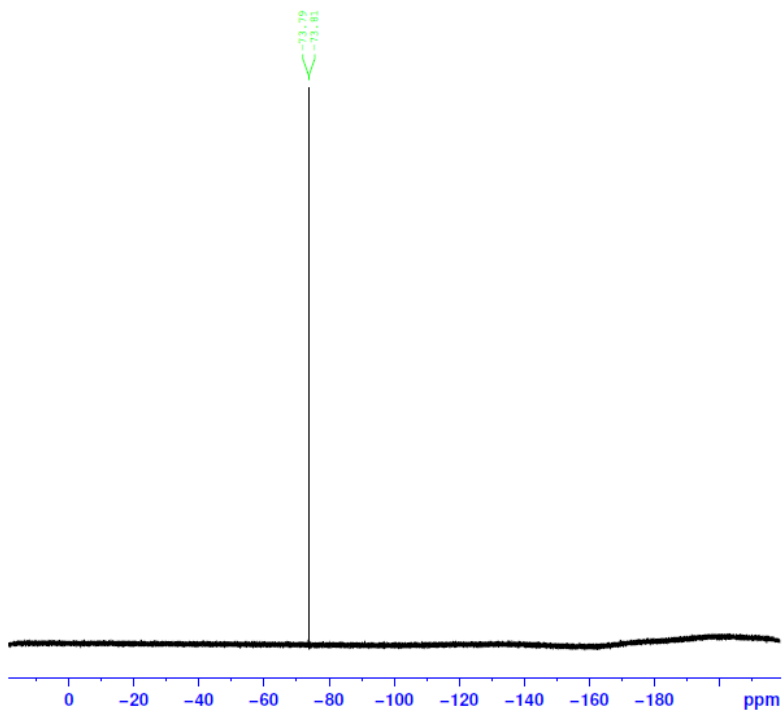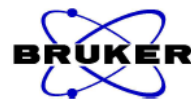

```

NAME      zhanghua0315f
EXPNO     1
PROCNO    1
Date_     20110315
Time      14.17
INSTRUM   spect
PROBHD    5 mm PABBO BB-
PULPROG   zgfgqn
TD         131072
SOLVENT   DMSO
NS         16
DS         4
SWH       89285.711 Hz
FIDRES    0.681196 Hz
AQ         0.7340532 sec
RG         912
DW         5.600 usec
DE         6.50 usec
TE         294.8 K
D1         1.0000000 sec
TDO        1

===== CHANNEL f1 =====
NUC1       19F
P1         14.10 usec
PL1        -3.00 dB
PL1W       14.33395481 W
SFO1       376.4607164 MHz
SI          65536
SF         376.4983660 MHz
WDW         EM
SSB         0
LB          0.30 Hz
GB          0
PC          1.00
    
```

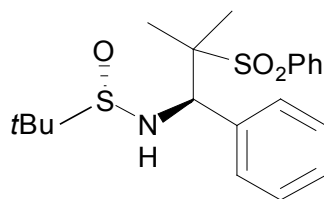

**5a** ( $^1\text{H}$  NMR and  $^{13}\text{C}$  NMR)

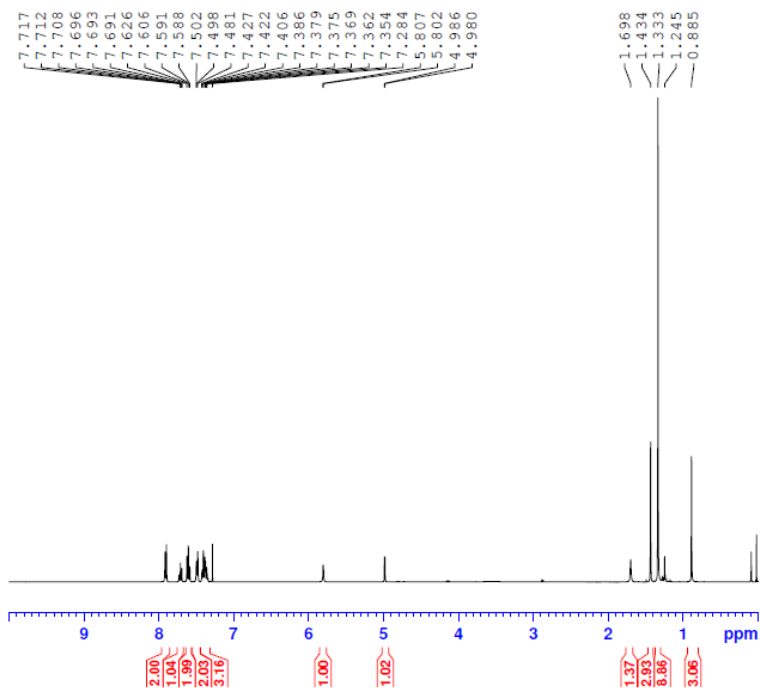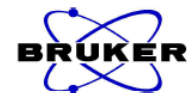

```

NAME      zhanghua110615-2.1
EXPNO    2
PROCNO   1
Date_    20110615
Time     17.45
INSTRUM  spect
PROBHD   5 mm PABBO BB-
PULPROG  zgpg30
ID       65536
SOLVENT  CDCl3
NS       16
DS       2
SWH      8223.685 Hz
FIDRES   0.125483 Hz
AQ       3.9846387 sec
RG       144
DW       60.800 usec
DE       6.50 usec
TE       296.3 K
D1       1.00000000 sec
TD0      1

----- CHANNEL f1 -----
NUC1     1H
P1       12.86 usec
PL1      -4.00 dB
PL1W    20.19063568 W
SF01     400.1324710 MHz
SI       32768
SF       400.1300000 MHz
WDW      EM
SSB      0
LB       0.30 Hz
GB       0
PC       1.00
    
```

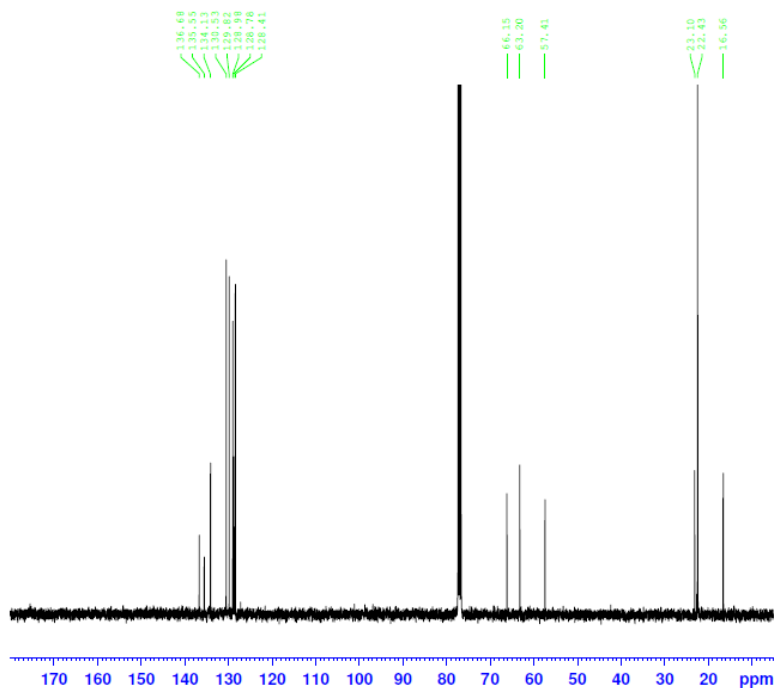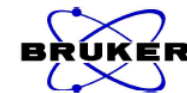

```

NAME      zhanghua110615-2.1-C
EXPNO    2
PROCNO   1
Date_    20110616
Time     18.32
INSTRUM  spect
PROBHD   5 mm PABBO BB-
PULPROG  zgpg30
ID       65536
SOLVENT  CDCl3
NS       1024
DS       4
SWH      24038.461 Hz
FIDRES   0.366798 Hz
AQ       1.3631988 sec
RG       1290
DW       20.800 usec
DE       6.50 usec
TE       299.1 K
D1       2.00000000 sec
D11      0.03000000 sec
TD0      1

----- CHANNEL f1 -----
NUC1     13C
P1       10.10 usec
PL1      -3.00 dB
PL1W    64.15196228 W
SF01     100.6228298 MHz

----- CHANNEL f2 -----
CPDPRG2  waltz16
NUC2     1H
PCPD2    80.00 usec
PL2      -4.00 dB
PL12     11.88 dB
PL13     12.00 dB
PL2W    20.19063568 W
PL12W   0.52137470 W
PL13W   0.50716585 W
SF02     400.1316005 MHz
SI       32768
SF       100.6127690 MHz
WDW      EM
SSB      0
LB       1.00 Hz
GB       0
PC       1.40
    
```

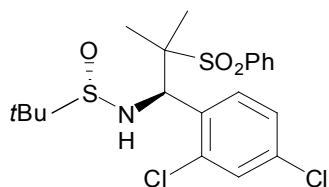

**5b** ( $^1\text{H}$  NMR and  $^{13}\text{C}$  NMR)

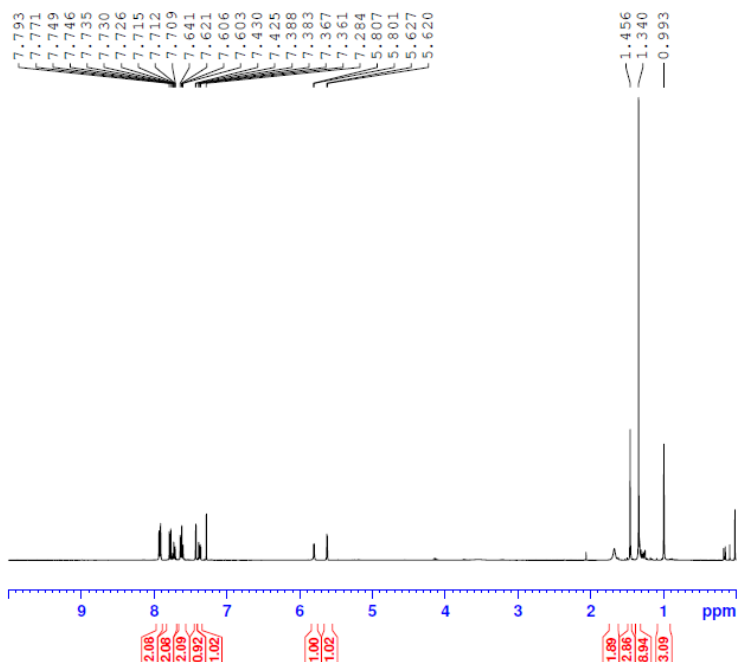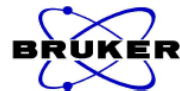

```

NAME      zhanghua110615-2.2
EXPNO    2
PROCNO   1
Date_    20110615
Time     17.54
INSTRUM  spect
PROBHD   5 mm PABBO BB-
PULPROG  zg30
TD        65536
SOLVENT  CDCl3
NS        16
DS        2
SWH       8223.685 Hz
FIDRES   0.125483 Hz
AQ        3.9846397 sec
RG        161
DW        60.800 usec
DE        6.50 usec
TE        296.2 K
D1        1.00000000 sec
TD0       1

----- CHANNEL f1 -----
NUC1     1H
P1       12.86 usec
PL1      -4.00 dB
PL1W     20.19063568 W
SFO1     400.1324710 MHz
SI        32768
SF        400.1300000 MHz
WDW       EM
SSB       0
LB        0.30 Hz
GB        0
PC        1.00
    
```

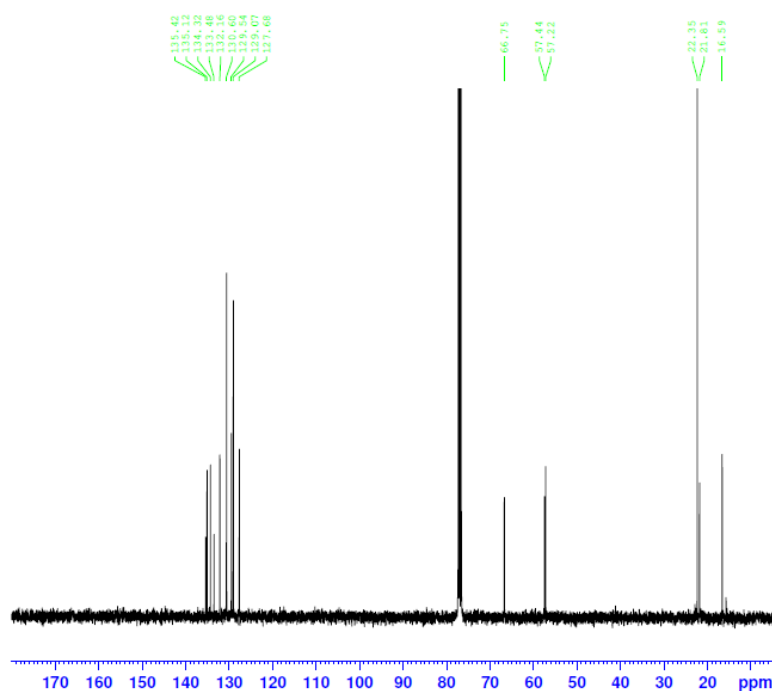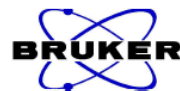

```

NAME      zhanghua110615-2.2-c
EXPNO    2
PROCNO   1
Date_    20110617
Time     10.01
INSTRUM  spect
PROBHD   5 mm PABBO BB-
PULPROG  zgpg30
TD        65536
SOLVENT  CDCl3
NS        1024
DS        4
SWH       24038.461 Hz
FIDRES   0.366798 Hz
AQ        1.3631988 sec
RG        362
DW        20.800 usec
DE        6.50 usec
TE        299.1 K
D1        2.00000000 sec
D11       0.03000000 sec
TD0       1

----- CHANNEL f1 -----
NUC1     13C
P1       10.10 usec
PL1      -3.00 dB
PL1W     64.15196228 W
SFO1     100.6228298 MHz

----- CHANNEL f2 -----
CPDPRG2  waltz16
NUC2     1H
PCPD2    80.00 usec
PL2      -4.00 dB
PL12     11.88 dB
PL13     12.00 dB
PL12W    20.19063568 W
PL12W    0.52137470 W
PL13W    0.50716585 W
SFO2     400.1316005 MHz
SI        32768
SF        100.6127690 MHz
WDW       EM
SSB       0
LB        1.00 Hz
GB        0
PC        1.40
    
```

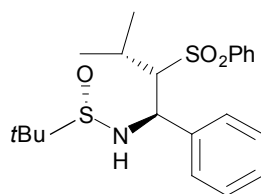

5c (<sup>1</sup>H NMR and <sup>13</sup>C NMR)

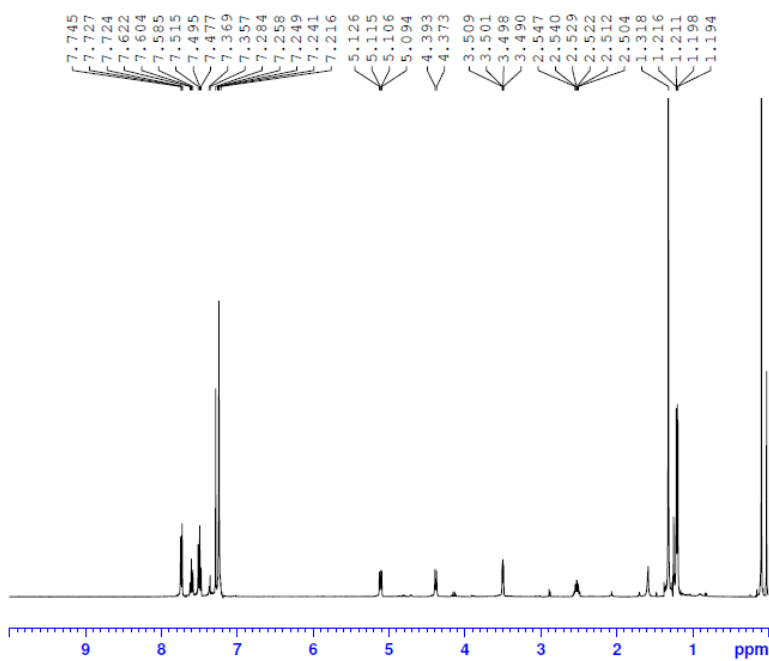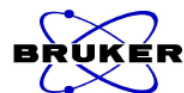

```

NAME      zhanghua2.5-H
EXPNO     1
PROCNO    1
Date_     20110520
Time      21.42
INSTRUM   spect
PROBHD    5 mm PABBO BB-
PULPROG   zg30
ID        65536
SOLVENT   CDCl3
NS        16
DS        2
SWH       8223.685 Hz
FIDRES    0.125483 Hz
AQ        3.9846387 sec
RG        362
DW        60.800 usec
DE        6.50 usec
TE        299.9 K
D1        1.00000000 sec
TD0       1
    
```

```

----- CHANNEL f1 -----
NUC1      1H
P1        11.10 usec
PL1       -4.00 dB
PL1W      20.19063568 W
SFO1      400.1324710 MHz
SI        32768
SF        400.1300000 MHz
WDW       EM
SSB       0
LB        0.30 Hz
GB        0
PC        1.00
    
```

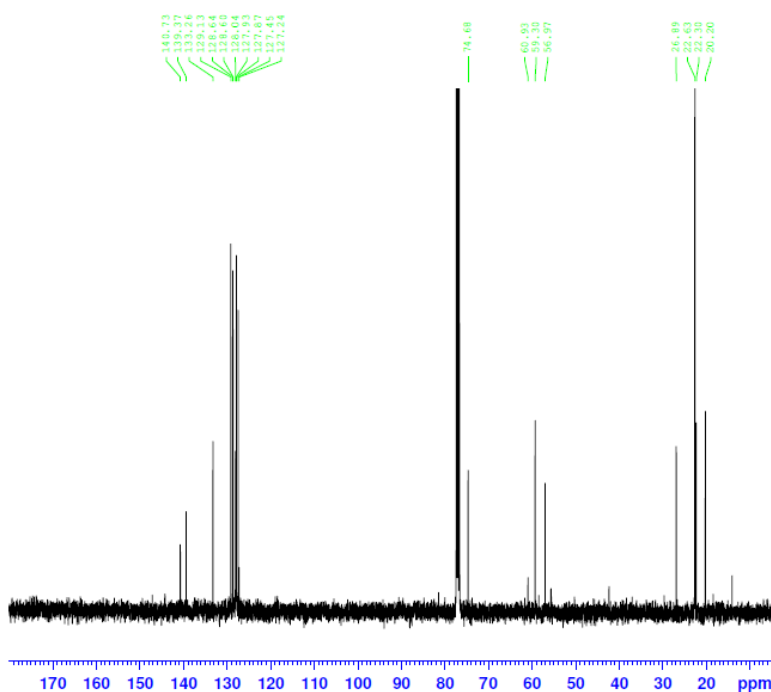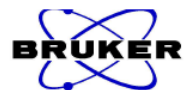

```

NAME      zhanghua110616-2.5-c
EXPNO     2
PROCNO    1
Date_     20110617
Time      11.08
INSTRUM   spect
PROBHD    5 mm PABBO BB-
PULPROG   zgpg30
ID        65536
SOLVENT   CDCl3
NS        1024
DS        4
SWH       24038.461 Hz
FIDRES    0.366798 Hz
AQ        1.3631988 sec
RG        456
DW        20.800 usec
DE        6.50 usec
TE        299.2 K
D1        2.00000000 sec
D11       0.03000000 sec
TD0       1
    
```

```

----- CHANNEL f1 -----
NUC1      13C
P1        10.10 usec
PL1       -3.00 dB
PL1W      64.15196228 W
SFO1      100.6228298 MHz

----- CHANNEL f2 -----
CPDPRG2   waltz16
NUC2      1H
PCPD2     80.00 usec
PL2       -4.00 dB
PL12      11.88 dB
PL13      12.00 dB
PL2W      20.19063568 W
PL12W     0.52137470 W
PL13W     0.50716595 W
SFO2      400.1316005 MHz
SI        32768
SF        100.6127690 MHz
WDW       EM
SSB       0
LB        1.00 Hz
GB        0
PC        1.40
    
```

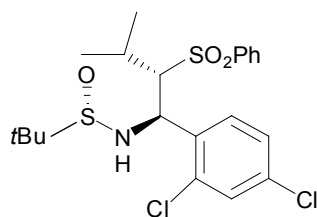

**5d** ( $^1\text{H}$  NMR and  $^{13}\text{C}$  NMR)

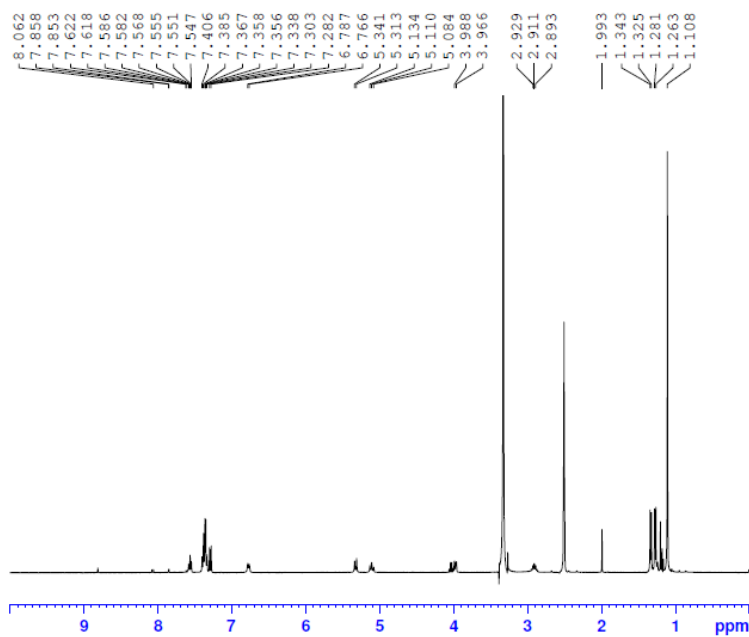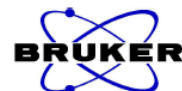

```

NAME zhanghua2.6-H (DMSO)
EXPNO 1
PROCNO 1
Date_ 20110608
Time 13.41
INSTRUM spect
PROBHD 5 mm PABBO BB-
PULPROG zg30
ID 65536
SOLVENT DMSO
NS 16
DS 2
SWH 8223.685 Hz
FIDRES 0.125493 Hz
AQ 3.9846387 sec
RG 203
DW 60.800 usec
DE 6.50 usec
TE 300.2 K
D1 1.00000000 sec
TD0 1

----- CHANNEL f1 -----
NUC1 1H
P1 11.10 usec
PL1 -4.00 dB
PL1W 20.19063568 W
SFO1 400.1324710 MHz
SI 32768
SF 400.1300000 MHz
WDW EM
SSB 0
LB 0.30 Hz
GB 0
PC 1.00
    
```

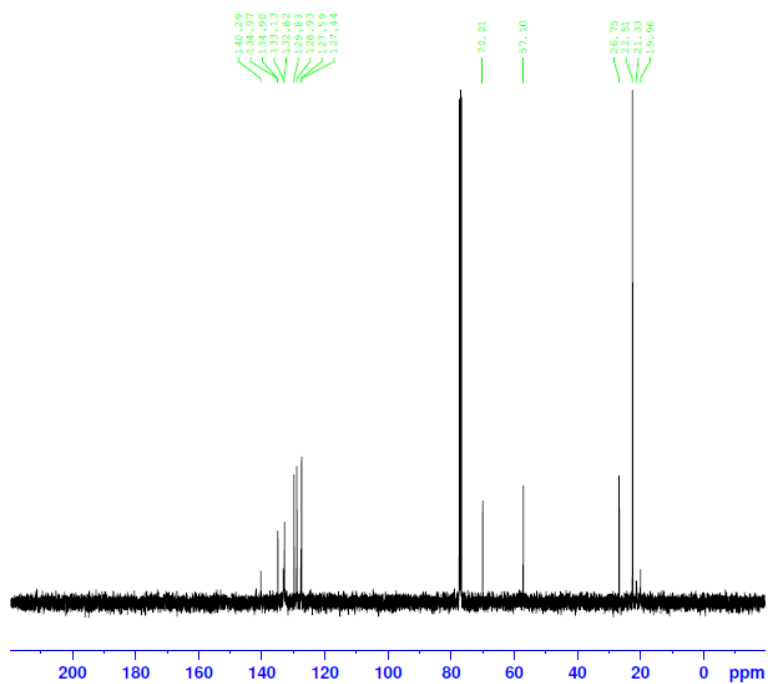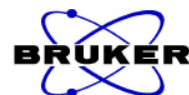

```

NAME zhanghua2.6-H
EXPNO 1
PROCNO 1
Date_ 20110520
Time 22.50
INSTRUM spect
PROBHD 5 mm PABBO BB-
PULPROG zgpg30
ID 65536
SOLVENT CDCl3
NS 4
DS 4
SWH 24038.461 Hz
FIDRES 0.366798 Hz
AQ 1.3631988 sec
RG 456
DW 20.800 usec
DE 6.50 usec
TE 302.2 K
D1 2.00000000 sec
D11 0.03000000 sec
TD0 1

----- CHANNEL f1 -----
NUC1 13C
P1 9.30 usec
PL1 -3.00 dB
PL1W 64.15196228 W
SFO1 100.6228298 MHz

----- CHANNEL f2 -----
CPDPRG2 waltz16
NUC2 1H
PCPD2 80.00 usec
PL2 -4.00 dB
PL12 13.16 dB
PL13 12.00 dB
PL2W 20.19063568 W
PL12W 0.38828444 W
PL13W 0.50716595 W
SFO2 400.1316005 MHz
SI 32768
SF 100.6127690 MHz
WDW EM
SSB 0
LB 1.00 Hz
GB 0
PC 1.40
    
```



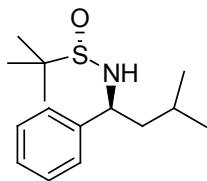

6 ( $^1\text{H}$  NMR and  $^{13}\text{C}$  NMR)

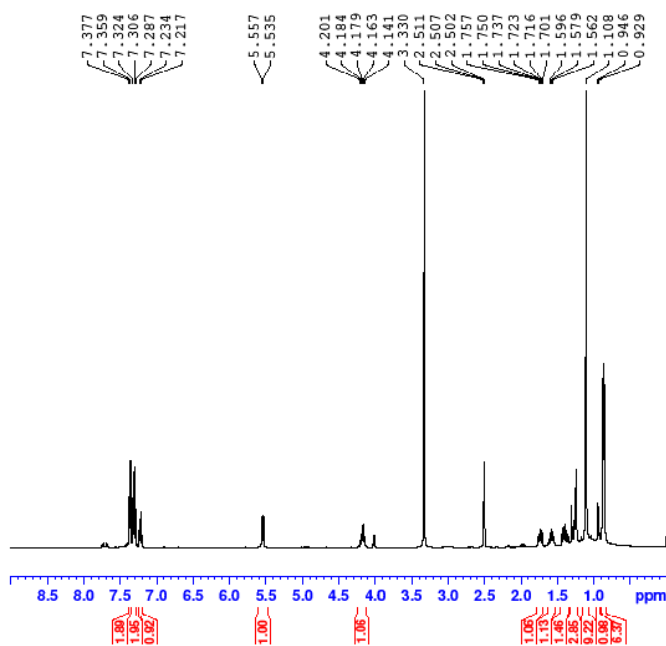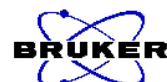

```

NAME zhanghua110719-5
EXPNO 1
PROCNO 1
Date_ 20110719
Time 21.40
INSTRUM spect
PROBHD 5 mm FAPBO BB-
PULPROG zg30
TD 65536
SOLVENT DMSO
NS 16
DS 2
SWH 8223.685 Hz
FIDRES 0.125483 Hz
AQ 3.9846387 sec
RG 101
DW 60.800 usec
DE 6.50 usec
TE 296.4 K
D1 1.0000000 sec
TD0 1
    
```

```

===== CHANNEL f1 =====
NUC1 1H
P1 12.86 usec
PL1 -4.00 dB
PL1W 20.19063568 W
SF01 400.1324710 MHz
SI 32768
SF 400.1300000 MHz
WDW EM
SSB 0
LB 0.30 Hz
GB 0
PC 1.00
    
```

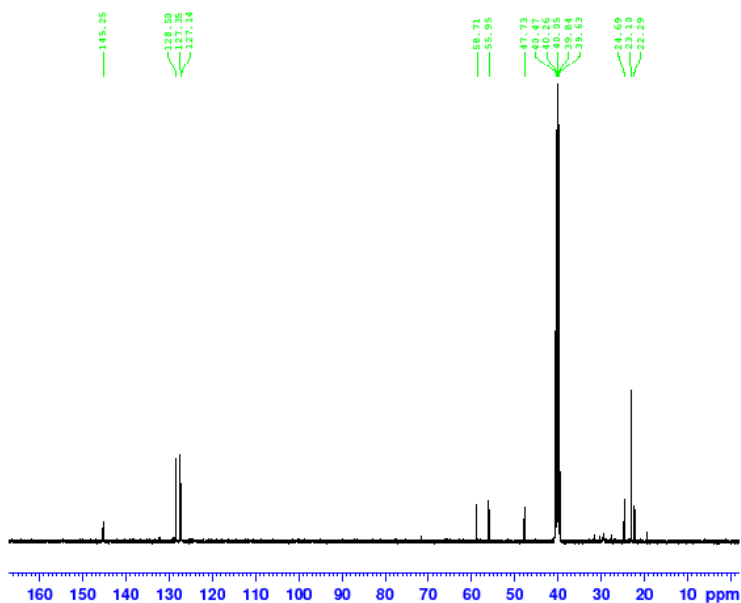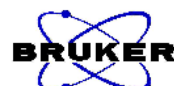

```

NAME zhanghua110719-5c
EXPNO 1
PROCNO 1
Date_ 20110719
Time 22.11
INSTRUM spect
PROBHD 5 mm FAPBO BB-
PULPROG zgpg30
TD 65536
SOLVENT DMSO
NS 4
DS 4
SWH 24038.461 Hz
FIDRES 0.366798 Hz
AQ 1.3631988 sec
RG 812
DW 20.800 usec
DE 6.50 usec
TE 298.9 K
D1 2.0000000 sec
D11 0.03000000 sec
TD0 1
    
```

```

===== CHANNEL f1 =====
NUC1 13C
P1 10.10 usec
PL1 -3.00 dB
PL1W 64.15196228 W
SF01 100.6228298 MHz

===== CHANNEL f2 =====
CPDPRG2 waltz16
NUC2 1H
PCPD2 80.00 usec
PL2 -4.00 dB
PL12 11.88 dB
PL13 12.00 dB
PL1W 20.19063568 W
PL12W 0.52137470 W
PL13W 0.50716585 W
SF02 400.1316005 MHz
SI 32768
SF 100.6127690 MHz
WDW EM
SSB 0
LB 1.00 Hz
GB 0
PC 1.40
    
```
